# Supplementary material for: A Novel Toxoplasma gondii Nuclear Factor TgNF3 Is a Dynamic Chromatin-Associated Component, Modulator of Nucleolar Architecture and Parasite Virulence
Source: PubMed Central journal article supplement (PMC3068996; doi:10.1371/journal.ppat.1001328), 2011-03-31
Supplement: ppat.1001328.s003.pdf [file ppat.1001328.s003.pdf]

Supplementary Table 1

| T. gondii nuclear factors | Protein name                                                                          | Protein accession number | Protein molecular weight (Da) | Number of unique peptides | Percentage sequence coverage | Peptide sequence                                                                                                                                                            | Nuclear localization using YFP tagging and/or specific antibodies | Slice number |
|---------------------------|---------------------------------------------------------------------------------------|--------------------------|-------------------------------|---------------------------|------------------------------|-----------------------------------------------------------------------------------------------------------------------------------------------------------------------------|-------------------------------------------------------------------|--------------|
| <b>Nuclear functions</b>  |                                                                                       |                          |                               |                           |                              |                                                                                                                                                                             |                                                                   |              |
| <b>TgNF1</b>              | DEAD/DEAH box helicase, putative TGME49_036650 [Toxoplasma gondii ME49]               | gi 211966692             | 59 951                        | 3                         | 7.5%                         | DMIGIAETGSGK<br>SGGFGGGPNALPLGSRPY<br>VTYLVMDADR                                                                                                                            | YES                                                               | 21           |
| <b>TgNF2</b>              | pinin/SDK/memA/ domain-containing protein TGME49_086790 [Toxoplasma gondii ME49]      | gi 211966969             | 36 006                        | 9                         | 40.9%                        | AMCTELDTSEPR<br>ESSEVKAEGETVAAGEDER<br>LEEVSTELSNK<br>LEEVSTELSNKENELMR<br>MFGALAGHLQR<br>NMEVFIGTEAQPTLFWAPAK<br>QLLMEQSTDLAHK<br>RPPGELFSLDKPEASAPSLPQK<br>VTYSFEGEEFQVEK | YES                                                               | 16           |
| <b>TgNF3</b>              | 46 kDa FK506-binding nuclear protein, putative TGME49_060440 [Toxoplasma gondii ME49] | gi 211962881             | 33 952                        | 7                         | 21.9%                        | ANASTFDVSNQVCSLK<br>DKLEFTSLDLFLSTR<br>TPLATLGQK<br>TYSVCMLQK<br>TYVQVIQEGK<br>SALVDFLK<br>SALVDFLKK                                                                        | YES                                                               | 16           |
|                           | SWIB/MDM2 domain-containing protein TGME49_073930 [Toxoplasma gondii ME49]            | gi 211963658             | 27 990                        | 3                         | 12.2%                        | DQVSMFELNK<br>HIWDYIK<br>MINADSTLRPLFQK                                                                                                                                     |                                                                   | 1            |
|                           | Gbp1p protein, putative TGME49_062620 [Toxoplasma gondii ME49]                        | gi 211963026             | 31 742                        | 4                         | 17.1%                        | ADVFEFQGR<br>ADVMTMPDGR<br>GCGIVEYTNVEDAQK<br>GVGTVLFSTPEGAQR                                                                                                               |                                                                   | 9            |
|                           | Nucleolar protein family A, putative TGME49_072010 [Toxoplasma gondii ME49]           | gi 211963509             | 20 913                        | 2                         | 16.2%                        | EEIGKVDEILGPINEMLFQSVR<br>GTLSQQVPYFNQR                                                                                                                                     |                                                                   | 9            |
|                           | RRM domain-containing protein TGME49_036540 [Toxoplasma gondii ME49]                  | gi 211966681             | 53 421                        | 3                         | 8.8%                         | QEMEFAAQGGDPR<br>TTGEAYVQLPDPGLR<br>TVMAAISGNTDSLDAQR                                                                                                                       |                                                                   | 17-20        |

## S1 (continued)

| T. gondii nuclear factors | Protein name                                                                                    | Protein accession number | Protein molecular weight (Da) | Number of unique peptides | Percentage sequence coverage | Peptide sequence                                                                                                                                                                                                                                                                                                                                              | Nuclear localization using YFP tagging and/or specific antibodies | Slice number |
|---------------------------|-------------------------------------------------------------------------------------------------|--------------------------|-------------------------------|---------------------------|------------------------------|---------------------------------------------------------------------------------------------------------------------------------------------------------------------------------------------------------------------------------------------------------------------------------------------------------------------------------------------------------------|-------------------------------------------------------------------|--------------|
|                           | Centromere/microtubule binding protein, putative TGME49_014210 [Toxoplasma gondii ME49]         | gj 211968418             | 56 726                        | 10                        | 28.9%                        | ALETLTGALFQRPPVVAVK<br>DHLVTMHDVLDAMHVDSTR<br>DSCVNAICYGAK<br>EATSDPGLVASAGTEGGK<br>KTDNYAIEPNSSSPIDTSK<br>LCGSEETENGEATEAAVKKEEQPR<br>LLDYDEQR<br>MKEATSDPGLVASAGTEGGK<br>RTIFPLELLLTGFPR<br>TPASWLK                                                                                                                                                         |                                                                   | 23-24        |
|                           | Nucleolar phosphoprotein nucleolin, putative TGME49_091930 [Toxoplasma gondii ME49]             | gj 211966199             | 73 100                        | 3                         | 6.1%                         | GIAFITFETEEAAQK<br>GQAFIEFDSIESATK<br>SLFEECGEIQEVR                                                                                                                                                                                                                                                                                                           |                                                                   | 28           |
|                           | krr1 family, zinc finger-containing protein TGME49_019150 [Toxoplasma gondii ME49]              | gj 211968343             | 99 371                        | 2                         | 4,0%                         | AFVDAAEVVEEGGAFLQK<br>ALADDVAYAPLAEDEER                                                                                                                                                                                                                                                                                                                       |                                                                   | 32           |
|                           | sec63 domain-containing DEAD/DEAH box helicase, putative TGME49_023390 [Toxoplasma gondii ME49] | gj 211963689             | 247 618                       | 19                        | 12.7%                        | ALVAEQVQAFSQR<br>ASNRYPVNVVEFQVSK<br>DTSTGVAPAVHLGEPTEGESLAGR<br>DVGDWLGVSSSGLFNHPSVR<br>EILQSEAEAVK<br>GATVLDADVTEIFFYKPTTQQTR<br>GLFFFGNHYRPVPLK<br>GTQVYLPEK<br>IVAMANSLANAK<br>LELAAFVQPLTR<br>LFSLSSEFK<br>LTAIDLLLQAAADDDPKK<br>LVEQSQLILATPENWDFVSR<br>LVGLSATLPNYDDVAVCLR<br>LVIIDEIHLLHDAR<br>MEQVYSGSFK<br>WLLSESSLPISFK<br>YENFELAK<br>YNTMNEVTYEK |                                                                   | 35           |

## S1 (continued)

| T. gondii nuclear factors                | Protein name                                                                                   | Protein accession number | Protein molecular weight (Da) | Number of unique peptides | Percentage sequence coverage | Peptide sequence                                                                                                                                                                  | Nuclear localization using YFP tagging and/or specific antibodies | Slice number |
|------------------------------------------|------------------------------------------------------------------------------------------------|--------------------------|-------------------------------|---------------------------|------------------------------|-----------------------------------------------------------------------------------------------------------------------------------------------------------------------------------|-------------------------------------------------------------------|--------------|
| <b>Enzymatic and chaperone functions</b> |                                                                                                |                          |                               |                           |                              |                                                                                                                                                                                   |                                                                   |              |
|                                          | Receptor for activated C kinase, RACK protein, putative TGME49_016880 [Toxoplasma gondii ME49] | gi 211968660             | 35 128                        | 10                        | 43.9%                        | DGVAMLWDVNEGK<br>FSPSANKPLIVSCGWDK<br>GVLEGHTDCVTAISTPSLK<br>IWDLENK<br>LWDLNAGVTVR<br>LWNTLAECK<br>NVLSEITPEK<br>SFQGHTSDVNSVAFSPDNR<br>SGAPWCTSLNWSHDGR<br>VIVWTLNDNPDDSGSVGYAR |                                                                   | 12-13        |
|                                          | Acid phosphatase, putative TGME49_019320 [Toxoplasma gondii ME49]                              | gi 211968360             | 46 589                        | 3                         | 11.6%                        | LAPADATEAAAAENHGYPK<br>LVSGTTGETLYTHK<br>WQSEFENVYSDANGALK                                                                                                                        |                                                                   | 18           |
|                                          | NADP-specific glutamate dehydrogenase, putative TGME49_093180 [Toxoplasma gondii ME49]         | gi 211967784             | 53 642                        | 5                         | 13.1%                        | AANAGGVAVSGLEMSQNAMR<br>DVPAGDIGVGAR<br>GFPLGQIQR<br>IVAEGANMPTR<br>VQYSSAAGPYK                                                                                                   |                                                                   | 18           |
|                                          | delta-aminolevulinic acid dehydratase, putative TGME49_053900 [Toxoplasma gondii ME49]         | gi 211967109             | 71 357                        | 3                         | 6.2%                         | AGADAVATYYAK<br>AGADMVCPDMMMDGR<br>GYISEKDTVLEVLK                                                                                                                                 |                                                                   | 23           |

## S1 (continued)

| T. gondii nuclear factors | Protein name                                                              | Protein accession number | Protein molecular weight (Da) | Number of unique peptides | Percentage sequence coverage | Peptide sequence                                                                                                                                                                                                                                                                                                                 | Nuclear localization using YFP tagging and/or specific antibodies | Slice number |
|---------------------------|---------------------------------------------------------------------------|--------------------------|-------------------------------|---------------------------|------------------------------|----------------------------------------------------------------------------------------------------------------------------------------------------------------------------------------------------------------------------------------------------------------------------------------------------------------------------------|-------------------------------------------------------------------|--------------|
|                           | Heat shock protein 70, putative<br>TGME49_073760 [Toxoplasma gondii ME49] | gj 211963641             | 72 276                        | 19                        | 35.7%                        | AIQEALDWLDK<br>ATAGDTHLGGEDFDNR<br>DAGTIAGLSVLR<br>EIAEAYLGK<br>EVESVCTPIITK<br>FDDPSVQSDMK<br>FEELCMDYFR<br>IQQLITDFFNGK<br>KFDDPSVQSDMK<br>LVDFCVQDFK<br>NDAVEIANDQGNR<br>NPENTIFDAK<br>NQLAEKEEFEAK<br>SINPDEAVAYGAAVQAAILK<br>SNQITITNDK<br>SQTFTTYADNQPGVLIQVYEGER<br>SVSEVVLVGGSTR<br>TTPSYVAFTDTER<br>VIAGPGDKPLIEVTYQGEK |                                                                   | 25-26-30     |
|                           | Heat shock protein 70, putative<br>TGME49_111720 [Toxoplasma gondii ME49] | gj 211962068             | 73 236                        | 18                        | 33.4%                        | DFNNGKEPNR<br>DKDLLPYEIIINK<br>DVEAVCNPIISK<br>ETAEQFLGK<br>FEELNSDLFQK<br>IINEPTAAAIAAYGLDK<br>ITPSYVAFTDDDR<br>ITPSYVAFTDDDRK<br>LTPEEIER<br>MKETAEQFLGK<br>NALEGYLHSMK<br>NAVVTVPAYFNDAQR<br>NEATINPTNTLFDVK<br>NGILSVSAVDK<br>VDIIPNDQGNR<br>VEVENLMEGVDFSETLTR<br>VTEAQEWLNTNPDAEETR<br>VYQQSGGPGAGGAAGGADDDYGGHDEL         |                                                                   | 26           |

## S1 (continued)

| T. gondii nuclear factors | Protein name                                                                  | Protein accession number | Protein molecular weight (Da) | Number of unique peptides | Percentage sequence coverage | Peptide sequence                                                                                                                                                                                                                           | Nuclear localization using YFP tagging and/or specific antibodies | Slice number |
|---------------------------|-------------------------------------------------------------------------------|--------------------------|-------------------------------|---------------------------|------------------------------|--------------------------------------------------------------------------------------------------------------------------------------------------------------------------------------------------------------------------------------------|-------------------------------------------------------------------|--------------|
|                           | p97 protein TGME49_075650 [Toxoplasma gondii ME49]                            | gi 211969256             | 101 140                       | 12                        | 21.8%                        | AHPGPLAATLADPEGWALYR<br>FAEWLEQQQQNPVEK<br>GNTTVPATYAEWMK<br>GPLHEVLQDPEGWK<br>GPLTTVLADPDGWDLYK<br>GQPVPDITYEEWR<br>IEATYEEWMAK<br>KAHEGPLEQVLADPEGWK<br>MVSEAPGVPSSPSTEVR<br>NMVSSGASIEQTFEEWAQSK<br>NVVDVPQSFEDFLQQPDQQK<br>YEDWVSHPTVR |                                                                   | 28           |
| <b>Unknown functions</b>  |                                                                               |                          |                               |                           |                              |                                                                                                                                                                                                                                            |                                                                   |              |
| <b>TgNF4</b>              | Hypothetical protein TGME49_005580 [Toxoplasma gondii ME49]                   | gi 211965453             | 51 203                        | 11                        | 26.6%                        | AFSAVIPESAK<br>EKVPVYLTDLQTGAIR<br>ETEEPEFDSAAMR<br>GVPMVIYER<br>KPEENANTEEKQEDGTGGATSPAVSNLK<br>LEIPGFGLVSGGVDLVIK<br>LHLFTMGR<br>QEDGTGGATSPAVSNLK<br>TRPPFAVDGR<br>TVLVHLLR<br>YGWCTAESR                                                | <b>YES</b>                                                        | 23-24        |
| <b>TgNF5</b>              | Hypothetical protein, conserved TGME49_021380 [Toxoplasma gondii ME49] ALBA 1 | gi 211967631             | 27 211                        | 7                         | 25.1%                        | AVTLAEVLK<br>AVTLAEVLKR<br>DKEPIGSNEIR<br>DPGYQAPIDESLVK<br>EMKPEEITK<br>LLTEQNMR<br>VMNYVAYAAR                                                                                                                                            | <b>YES</b>                                                        | 13           |
| <b>TgNF6</b>              | Hypothetical protein, conserved TGME49_018820 [Toxoplasma gondii ME49] ALBA 2 | gi 211968320             | 15 374                        | 5                         | 33.8%                        | DDKPACDEVIITGLGMATK<br>TAIGAASLLQR<br>TPEFAEQIK<br>TPEFAEQIKK<br>VETSYFSSTR                                                                                                                                                                | <b>YES</b>                                                        | 2-4-5        |

## S1 (continued)

| T. gondii nuclear factors | Protein name                                                           | Protein accession number | Protein molecular weight (Da) | Number of unique peptides | Percentage sequence coverage | Peptide sequence                                                                                                                                  | Nuclear localization using YFP tagging and/or specific antibodies | Slice number |
|---------------------------|------------------------------------------------------------------------|--------------------------|-------------------------------|---------------------------|------------------------------|---------------------------------------------------------------------------------------------------------------------------------------------------|-------------------------------------------------------------------|--------------|
| TgNF7                     | Hypothetical protein TGME49_048810 [Toxoplasma gondii ME49]            | gi 211964891             | 54 264                        | 9                         | 22.5%                        | DMSATEYELVVLK                                                                                                                                     | ?                                                                 | 21           |
|                           |                                                                        |                          |                               |                           |                              | EGHMVVGDESAVITLK                                                                                                                                  |                                                                   |              |
|                           |                                                                        |                          |                               |                           |                              | FVGPAEEEVER                                                                                                                                       |                                                                   |              |
|                           |                                                                        |                          |                               |                           |                              | IISDIPEAEK                                                                                                                                        |                                                                   |              |
|                           |                                                                        |                          |                               |                           |                              | MFQDWLSVYATADR                                                                                                                                    |                                                                   |              |
|                           |                                                                        |                          |                               |                           |                              | SPHVAVGLSGGER                                                                                                                                     |                                                                   |              |
|                           |                                                                        |                          |                               |                           |                              | TDMCLFVK                                                                                                                                          |                                                                   |              |
|                           |                                                                        |                          |                               |                           |                              | VDLPSSISQADWER                                                                                                                                    |                                                                   |              |
|                           |                                                                        |                          |                               |                           |                              | YRNPLAESSEEAK                                                                                                                                     |                                                                   |              |
|                           | Hypothetical protein TGME49_013050 [Toxoplasma gondii ME49]            | gi 211968718             | 19 684                        | 2                         | 12.4%                        | EGVQSAANITEK<br>VANLQQAMR                                                                                                                         |                                                                   | 2            |
|                           | Hypothetical protein, conserved TGME49_018820 [Toxoplasma gondii ME49] | gi 211968320             | 15 374                        | 2                         | 33.8%                        | TPEFAEQIK<br>VETSYFSSTR                                                                                                                           |                                                                   | 4            |
|                           | Hypothetical protein TGME49_028630 [Toxoplasma gondii ME49]            | gi 211964139             | 24 254                        | 2                         | 12.6%                        | GTLQATGASSPISSQK<br>SSWGWSTPPDQWK                                                                                                                 |                                                                   | 4            |
|                           | Hypothetical protein TGME49_007440 [Toxoplasma gondii ME49]            | gi 211967222             | 34 765                        | 9                         | 28.9%                        | EVMMIVMQR<br>FEAGNMAMVTGGHNVGR<br>GVPALITHDGR<br>IAAPHHWMLDK<br>ISNVFVIGK<br>ISNVFVIGKGEK<br>LRYALTYR<br>TDQCYPAGFMDVISIEK<br>VRTDQCYPAGFMDVISIEK |                                                                   | 10           |
|                           | Hypothetical protein, conserved TGME49_119850 [Toxoplasma gondii ME49] | gi 211967516             | 56 644                        | 2                         | 7.3%                         | GDYGGYGPSSSGGPQSDR<br>TGAASTQAGSDAATMNSTR                                                                                                         |                                                                   | 15           |
|                           | Hypothetical protein [Toxoplasma gondii RH]                            | gi 95007135              | 83 567                        | 4                         | 8.0%                         | EVASMEGASPAAFQAAQQR<br>GAFLGAGATGIVTELIEK<br>KLVDEHPFFQVVEDA<br>LLLDPHETR                                                                         |                                                                   | 16           |
|                           | Hypothetical protein TGME49_107810 [Toxoplasma gondii ME49]            | gi 211969572             | 44 152                        | 2                         | 7.8%                         | EAMTVEELQAAVHEAR<br>GQDANAPESAAETAPPR                                                                                                             |                                                                   | 19           |
|                           | Hypothetical protein TGME49_032440 [Toxoplasma gondii ME49]            | gi 211965778             | 54 027                        | 3                         | 7.1%                         | LGFSSTEEIDKR<br>SRLDELQAQMDK<br>YQAFLAQQR                                                                                                         |                                                                   | 20           |

## S1 (continued)

| T. gondii nuclear factors | Protein name                                                           | Protein accession number | Protein molecular weight (Da) | Number of unique peptides | Percentage sequence coverage | Peptide sequence                                                                                                             | Nuclear localization using YFP tagging and/or specific antibodies | Slice number |
|---------------------------|------------------------------------------------------------------------|--------------------------|-------------------------------|---------------------------|------------------------------|------------------------------------------------------------------------------------------------------------------------------|-------------------------------------------------------------------|--------------|
|                           | Hypothetical protein TGME49_040060 [Toxoplasma gondii ME49]            | gi 211964299             | 88 515                        | 4                         | 8.3%                         | AVPSGEQPPPPPPHSPPR<br>GASTASLHSEPGAASMPGSPK<br>GFDRPGTTGTTGPQVR<br>KSPPLPLQEQR                                               |                                                                   | 21           |
|                           | Hypothetical protein TGME49_112490 [Toxoplasma gondii ME49]            | gi 211962135             | 51 601                        | 2                         | 7.5%                         | SDLLSLLATDEDFYAEDR<br>SSYVSEMILGEPDSTVR                                                                                      |                                                                   | 22           |
|                           | Hypothetical protein TGME49_055350 [Toxoplasma gondii ME49]            | gi 211962527             | 66 010                        | 4                         | 8.0%                         | HMFETEIR<br>SGIDQAAEGGGWHGSK<br>TSMIVTTDAVEAR<br>VQSDPFAPPSR                                                                 |                                                                   | 26           |
|                           | Hypothetical protein TGME49_051170 [Toxoplasma gondii ME49]            | gi 211965042             | 75 621                        | 6                         | 14.7%                        | ALLSSASGQVPEPLR<br>EHPPPATGGPLPQR<br>ELYVELGVAER<br>IAEYMLEEHNPSPSSSEIR<br>QQGQDAGEGTAATGPSAPSVSSASPMSR<br>YTPVPTTTPPYPADVER |                                                                   | 27-28-29     |
|                           | Hypothetical protein TGME49_030930 [Toxoplasma gondii ME49]            | gi 211965658             | 34 572                        | 2                         | 7.0%                         | LQQNALLSGR<br>VQQAVAEIVEEK                                                                                                   |                                                                   | 28           |
|                           | Conserved hypothetical protein TGGT1_102650 [Toxoplasma gondii GT1]    | gi 221485011             | 2 905                         | 2                         | 13.6%                        | LESMASEIAAK<br>LLAAGVDLSHVPGDASLTPGASDQGPR                                                                                   |                                                                   | 29           |
|                           | Hypothetical protein TGME49_089380 [Toxoplasma gondii ME49]            | gi 211966037             | 100 228                       | 5                         | 6.6%                         | ATVDYLDELGK<br>AVAELAATNAGTEK<br>GALPASAPVR<br>QAVAATETTPFSSAQK<br>VMFVGDSAER                                                |                                                                   | 29           |
|                           | Hypothetical protein, conserved TGME49_106400 [Toxoplasma gondii ME49] | gi 211968066             | 142 579                       | 5                         | 6.0%                         | AAEQDAVGPALQASR<br>GPSSGGGAAPVVLRL<br>IVILAETGSTAEDVTNR<br>LQGESEEEGEEEGEGEGQR<br>VTLPAGEGPR                                 |                                                                   | 31-33        |
|                           | Hypothetical protein, conserved TGME49_047450 [Toxoplasma gondii ME49] | gi 211964776             | 245 852                       | 3                         | 1.9%                         | AVVYLQSQQQAESAQYR<br>GPLSPPYGSQR<br>IEEGEEGGFSHFGYR                                                                          |                                                                   | 33           |
