# Supplementary material for: A Novel Toxoplasma gondii Nuclear Factor TgNF3 Is a Dynamic Chromatin-Associated Component, Modulator of Nucleolar Architecture and Parasite Virulence
Source: PubMed Central journal article supplement (PMC3068996; doi:10.1371/journal.ppat.1001328), 2011-03-31
Supplement: ppat.1001328.s004.pdf [file ppat.1001328.s004.pdf]

|    | Genes   |         |       |               | Contigs                                                     |       | Gene names |                                                                |
|----|---------|---------|-------|---------------|-------------------------------------------------------------|-------|------------|----------------------------------------------------------------|
|    | Start   | End     | Chr   | ID            | Contig position                                             | Reads | Sense      | Description                                                    |
| 1  | 137459  | 143397  | Chr1a | TGME49_093180 | 144086 - 144346<br>144833 - 145078                          | 11    | -          | NADP-specific glutamate dehydrogenase, putative                |
| 2  | 147102  | 155058  | Chr1a | TGME49_093190 | 144086 - 144346<br>144833 - 145078                          | 11    | +          | endonuclease/exonuclease/phosphatase domain-containing protein |
| 3  | 163972  | 164370  | Chr1a | TGME49_093210 | 159957 - 160310                                             | 2     | +          | hypothetical protein, conserved                                |
| 4  | 365539  | 383355  | Chr1a | TGME49_093500 | 361855 - 362182                                             | 1     | +          | hypothetical protein                                           |
| 5  | 384776  | 386720  | Chr1a | TGME49_093510 | 387911 - 388101                                             | 1     | -          | polyADP-ribose polymerase domain-containing protein            |
| 6  | 421458  | 428938  | Chr1a | TGME49_093570 | 429499 - 429683<br>429743 - 429977                          | 3     | -          | translocation protein Sec62, putative                          |
| 7  | 587848  | 591645  | Chr1a | TGME49_093830 | 592306 - 592537                                             | 2     | -          | calpain, putative                                              |
| 8  | 675042  | 675113  | Chr1a | TGME49_094070 | 675241 - 675544                                             | 1     | -          | tRNA-Gly                                                       |
| 9  | 676757  | 683589  | Chr1a | TGME49_094180 | 683827 - 684010                                             | 1     | -          | tRNA guanine-N7--methyltransferase, putative                   |
| 10 | 686345  | 694895  | Chr1a | TGME49_094190 | 683827 - 684010                                             | 1     | +          | hypothetical protein, conserved                                |
| 11 | 707286  | 714876  | Chr1a | TGME49_094210 | 715446 - 715655<br>716147 - 716413                          | 4     | -          | hypothetical protein                                           |
| 12 | 873265  | 875754  | Chr1a | TGME49_094390 | 876265 - 876517                                             | 2     | -          | myosin light chain TgMLC4, putative                            |
| 13 | 1049541 | 1050071 | Chr1a | TGME49_094660 | 1050167 - 1050425                                           | 1     | -          | hypothetical protein                                           |
| 14 | 1214241 | 1216567 | Chr1a | TGME49_094850 | 1217884 - 1218151                                           | 1     | -          | actin-like protein 7, putative                                 |
| 15 | 1220630 | 1229749 | Chr1a | TGME49_094860 | 1217884 - 1218151                                           | 1     | +          | hypothetical protein                                           |
| 16 | 1300192 | 1301631 | Chr1a | TGME49_094980 | 1300072 - 1300341                                           | 1     | +          | hypothetical protein                                           |
| 17 | 1301842 | 1302471 | Chr1a | TGME49_094990 | 1301409 - 1301734                                           | 1     | +          | hypothetical protein                                           |
| 18 | 1454785 | 1456851 | Chr1a | TGME49_095980 | 1454008 - 1454335<br>1454359 - 1454742                      | 2     | +          | hypothetical protein                                           |
| 19 | 1501115 | 1506666 | Chr1a | TGME49_095790 | 1507579 - 1507851                                           | 1     | -          | hypothetical protein                                           |
| 20 | 1509497 | 1511206 | Chr1a | TGME49_095780 | 1507579 - 1507851                                           | 1     | +          | hypothetical protein                                           |
| 21 | 1511727 | 1518040 | Chr1a | TGME49_095770 | 1511543 - 1511802                                           | 1     | +          | hypothetical protein                                           |
| 22 | 1555635 | 1559045 | Chr1a | TGME49_095730 | 1559398 - 1559565<br>1560496 - 1560752<br>1561121 - 1561354 | 3     | -          | TPR domain-containing protein                                  |

|    |         |         |       |               |                                                             |   |   |                                                         |
|----|---------|---------|-------|---------------|-------------------------------------------------------------|---|---|---------------------------------------------------------|
| 23 | 1562558 | 1567762 | Chr1a | TGME49_095720 | 1559398 - 1559565<br>1560496 - 1560752<br>1561121 - 1561354 | 3 | + | sulfite oxidase, putative                               |
| 24 | 61456   | 63727   | Chr1b | TGME49_007440 | 66170 - 66488                                               | 1 | - | hypothetical protein                                    |
| 25 | 68762   | 74619   | Chr1b | TGME49_007450 | 66170 - 66488                                               | 1 | + | hypothetical protein, conserved                         |
| 26 | 140424  | 143521  | Chr1b | TGME49_007590 | 139579 - 139859                                             | 1 | + | T-cell activation protein phosphatase 2C,               |
| 27 | 299314  | 299880  | Chr1b | TGME49_007790 | 302107 - 302459<br>302628 - 302915                          | 2 | - | hypothetical protein                                    |
| 28 | 325524  | 327575  | Chr1b | TGME49_007840 | 333835 - 334058                                             | 1 | - | 40S ribosomal protein S17, putative                     |
| 29 | 335249  | 336361  | Chr1b | TGME49_007850 | 333835 - 334058                                             | 1 | + | hypothetical protein                                    |
| 30 | 575282  | 586308  | Chr1b | TGME49_008070 | 586218 - 586439                                             | 1 | - | inositol polyphosphate kinase domain-containing protein |
| 31 | 701805  | 708311  | Chr1b | TGME49_008430 | 708211 - 708344                                             | 1 | - | serine proteinase inhibitor TgPI-2, putative            |
| 32 | 708502  | 709733  | Chr1b | TGME49_008440 | 708211 - 708344                                             | 1 | + | hypothetical protein, conserved                         |
| 33 | 773707  | 774985  | Chr1b | TGME49_008550 | 770782 - 771003<br>771497 - 771699<br>772095 - 772258       | 3 | + | hypothetical protein                                    |
| 34 | 776606  | 782003  | Chr1b | TGME49_008560 | 783388 - 783651                                             | 1 | - | mitochondrial carrier domain-containing protein         |
| 35 | 784297  | 790712  | Chr1b | TGME49_008570 | 783388 - 783651                                             | 1 | + | hypothetical protein                                    |
| 36 | 822287  | 825582  | Chr1b | TGME49_008720 | 827661 - 828046<br>830992 - 831094                          | 3 | - | phosphatase, putative                                   |
| 37 | 855707  | 857596  | Chr1b | TGME49_008780 | 854734 - 855005                                             | 1 | + | ubiquitin-conjugating enzyme E2, putative               |
| 38 | 985374  | 993530  | Chr1b | TGME49_009020 | 995168 - 995473                                             | 1 | - | hypothetical protein                                    |
| 39 | 996576  | 998954  | Chr1b | TGME49_009030 | 995168 - 995473                                             | 1 | + | actin                                                   |
| 40 | 1090710 | 1091995 | Chr1b | TGME49_009170 | 1091874 - 1092120<br>1093429 - 1093789                      | 3 | - | hypothetical protein                                    |
| 41 | 1098137 | 1099767 | Chr1b | TGME49_009180 | 1091874 - 1092120<br>1093429 - 1093789                      | 3 | + | PAN domain-containing protein, putative                 |
| 42 | 1151808 | 1156638 | Chr1b | TGME49_009260 | 1157398 - 1157686<br>1158207 - 1158450                      | 3 | - | cytochrome c oxidase, putative                          |
| 43 | 1247950 | 1251784 | Chr1b | TGME49_009470 | 1252320 - 1252798                                           | 3 | - | hypothetical protein                                    |
| 44 | 1253119 | 1254432 | Chr1b | TGME49_009480 | 1252320 - 1252798                                           | 3 | + | hypothetical protein                                    |
| 45 | 1364497 | 1367400 | Chr1b | TGME49_009630 | 1368095 - 1368379                                           | 1 | - | hypothetical protein                                    |
| 46 | 1368784 | 1370252 | Chr1b | TGME49_009640 | 1368095 - 1368379                                           | 1 | + | hypothetical protein                                    |
| 47 | 1403629 | 1405121 | Chr1b | TGME49_009700 | 1403271 - 1403599                                           | 2 | + | hypothetical protein                                    |

|    |         |         |        |               |                                        |   |   |                                                                     |
|----|---------|---------|--------|---------------|----------------------------------------|---|---|---------------------------------------------------------------------|
| 48 | 1484602 | 1488979 | Chrlb  | TGME49_009850 | 1491254 - 1491599                      | 5 | - | hypothetical protein                                                |
| 49 | 1492391 | 1496468 | Chrlb  | TGME49_009860 | 1491254 - 1491599                      | 5 | + | nucleolar phosphoprotein p130, putative                             |
| 50 | 1554454 | 1561232 | Chrlb  | TGME49_009940 | 1553606 - 1553873                      | 1 | + | hypothetical protein                                                |
| 51 | 1820247 | 1821911 | Chrlb  | TGME49_121420 | 1817774 - 1818008                      | 1 | + | kelch motif domain-containing protein                               |
| 52 | 1825445 | 1836350 | Chrlb  | TGME49_121410 | 1836624 - 1836932                      | 1 | - | hypothetical protein                                                |
| 53 | 1837639 | 1838908 | Chrlb  | TGME49_121400 | 1836624 - 1836932                      | 1 | + | microsomal signal peptidase subunit SPCS1 domain-containing protein |
| 54 | 3198    | 8889    | ChrII  | TGME49_020840 | 9573 - 9793                            | 1 | - | threonine synthase, putative                                        |
| 55 | 15972   | 18893   | ChrII  | TGME49_020870 | 21246 - 21613                          | 1 | - | hypothetical protein                                                |
| 56 | 21396   | 23674   | ChrII  | TGME49_020880 | 21246 - 21613                          | 1 | + | hypothetical protein                                                |
| 57 | 156781  | 162917  | ChrII  | TGME49_021250 | 154367 - 154664                        | 1 | + | hypothetical protein                                                |
| 58 | 519935  | 534178  | ChrII  | TGME49_021670 | 535396 - 535536<br>535561 - 535848     | 2 | - | transcription elongation factor FACT 140 kDa, putative              |
| 59 | 1116481 | 1118211 | ChrII  | TGME49_022420 | 1115392 - 1115584                      | 2 | + | hypothetical protein                                                |
| 60 | 1239901 | 1252924 | ChrII  | TGME49_022860 | 1252628 - 1252938                      | 2 | - | eukaryotic translation initiation factor 3 subunit 9, putative      |
| 61 | 1253266 | 1255403 | ChrII  | TGME49_022870 | 1252628 - 1252938                      | 2 | + | hypothetical protein                                                |
| 62 | 1358164 | 1359921 | ChrII  | TGME49_023030 | 1360539 - 1360811                      | 3 | - | hypothetical protein                                                |
| 63 | 1586564 | 1587145 | ChrII  | TGME49_097190 | 1587564 - 1587793                      | 1 | - | hypothetical protein, conserved                                     |
| 64 | 1588241 | 1597193 | ChrII  | TGME49_097200 | 1587564 - 1587793                      | 1 | + | hypothetical protein                                                |
| 65 | 1889638 | 1893274 | ChrII  | TGME49_097670 | 1888874 - 1889179<br>1889209 - 1889542 | 2 | + | hypothetical protein                                                |
| 66 | 290406  | 294793  | ChrIII | TGME49_075670 | 294621 - 294887<br>296572 - 296812     | 3 | - | hypothetical protein, conserved                                     |
| 67 | 321020  | 325321  | ChrIII | TGME49_075620 | 327960 - 328369                        | 2 | - | hypothetical protein                                                |
| 68 | 596709  | 597381  | ChrIII | TGME49_052490 | 598090 - 598325                        | 1 | - | vacuolar protein sorting 29, putative                               |
| 69 | 979245  | 986216  | ChrIII | TGME49_053490 | 978822 - 979186                        | 2 | + | hypothetical protein                                                |
| 70 | 1038518 | 1043589 | ChrIII | TGME49_053580 | 1037221 - 1037433                      | 1 | + | CMGC kinase, CDK family                                             |
| 71 | 1207413 | 1214328 | ChrIII | TGME49_053810 | 1215877 - 1216210                      | 3 | - | hypothetical protein                                                |
| 72 | 1217545 | 1219989 | ChrIII | TGME49_053820 | 1215877 - 1216210                      | 3 | + | hypothetical protein, conserved                                     |
| 73 | 1434105 | 1435872 | ChrIII | TGME49_054080 | 1432315 - 1432449                      | 1 | + | zinc transporter ZIP domain-containing                              |
| 74 | 1564671 | 1566331 | ChrIII | TGME49_054270 | 1564274 - 1564535                      | 1 | + | hypothetical protein                                                |
| 75 | 1581426 | 1592571 | ChrIII | TGME49_054300 | 1579960 - 1580245                      | 1 | + | hypothetical protein                                                |
| 76 | 1735087 | 1738428 | ChrIII | TGME49_054440 | 1740288 - 1740491                      | 1 | - | 60S ribosomal protein L12, putative                                 |
| 77 | 1743620 | 1750167 | ChrIII | TGME49_054450 | 1740288 - 1740491                      | 1 | + | cell division protein pelota, putative                              |
| 78 | 1759977 | 1763520 | ChrIII | TGME49_054480 | 1767764 - 1768091                      | 1 | - | WD-40 repeat-containing protein                                     |

|     |         |         |        |               |                                                       |   |   |                                                      |
|-----|---------|---------|--------|---------------|-------------------------------------------------------|---|---|------------------------------------------------------|
| 79  | 1768385 | 1782821 | ChrIII | TGME49_054490 | 1767764 - 1768091                                     | 1 | + | hypothetical protein                                 |
| 80  | 644610  | 650675  | ChrIV  | TGME49_119910 | 650944 - 651169                                       | 1 | - | hypothetical protein                                 |
| 81  | 965738  | 978376  | ChrIV  | TGME49_119370 | 978489 - 978707                                       | 1 | - | hypothetical protein                                 |
| 82  | 982436  | 983848  | ChrIV  | TGME49_119360 | 978489 - 978707                                       | 1 | + | SRS17                                                |
| 83  | 1117577 | 1120907 | ChrIV  | TGME49_118700 | 1115661 - 1115854                                     | 1 | + | eukaryotic translation initiation factor 6, putative |
| 84  | 1130628 | 1139119 | ChrIV  | TGME49_118680 | 1139207 - 1139407                                     | 1 | - | 3',5'-cyclic-nucleotide phosphodiesterase, putative  |
| 85  | 1240402 | 1254114 | ChrIV  | TGME49_118510 | 1256318 - 1256577                                     | 1 | - | N-ethylmaleimide-sensitive factor                    |
| 86  | 1288961 | 1296264 | ChrIV  | TGME49_118460 | 1296305 - 1296485<br>1297701 - 1297988                | 7 | - | cation-transporting ATPase, putative                 |
| 87  | 1297774 | 1298555 | ChrIV  | TGME49_118450 | 1296305 - 1296485<br>1297701 - 1297988                | 7 | + | zinc finger C3HC4 RING finger protein, putative      |
| 88  | 1708048 | 1713145 | ChrIV  | TGME49_011420 | 1713676 - 1713970                                     | 1 | - | hypothetical protein                                 |
| 89  | 1714340 | 1724125 | ChrIV  | TGME49_011410 | 1713676 - 1713970                                     | 1 | + | hypothetical protein, conserved                      |
| 90  | 1824774 | 1826229 | ChrIV  | TGME49_011300 | 1824384 - 1824634                                     | 1 | + | hypothetical protein                                 |
| 91  | 1837858 | 1841297 | ChrIV  | TGME49_011280 | 1841672 - 1841960                                     | 1 | - | hypothetical protein                                 |
| 92  | 1907805 | 1910416 | ChrIV  | TGME49_011100 | 1911885 - 1912059                                     | 1 | - | hypothetical protein                                 |
| 93  | 1942135 | 1947424 | ChrIV  | TGME49_011020 | 1948193 - 1948385<br>1950098 - 1950358                | 2 | - | RNA-binding protein, putative                        |
| 94  | 1950468 | 1956305 | ChrIV  | TGME49_011010 | 1948193 - 1948385<br>1950098 - 1950358                | 2 | + | hypothetical protein                                 |
| 95  | 2267527 | 2276360 | ChrIV  | TGME49_101220 | 2279389 - 2279746                                     | 1 | - | hypothetical protein                                 |
| 96  | 2279491 | 2284864 | ChrIV  | TGME49_101230 | 2279389 - 2279746                                     | 1 | + | DNA repair protein, putative                         |
| 97  | 2476991 | 2478657 | ChrIV  | TGME49_101690 | 2473852 - 2474052<br>2474800 - 2475195                | 2 | + | hypothetical protein                                 |
| 98  | 348909  | 350827  | ChrIX  | TGME49_079350 | 351015 - 351325<br>352148 - 352422<br>355077 - 355432 | 6 | - | hypothetical protein                                 |
| 99  | 442807  | 447722  | ChrIX  | TGME49_067810 | 441090 - 441310                                       | 1 | + | Rab 5                                                |
| 100 | 499451  | 502301  | ChrIX  | TGME49_067740 | 498694 - 498904                                       | 1 | + | hypothetical protein                                 |
| 101 | 702773  | 704730  | ChrIX  | TGME49_067530 | 705665 - 705980                                       | 1 | - | hypothetical protein                                 |
| 102 | 706316  | 707571  | ChrIX  | TGME49_067520 | 705665 - 705980                                       | 1 | + | hypothetical protein                                 |
| 103 | 1104784 | 1105386 | ChrIX  | TGME49_066720 | 1105960 - 1106207<br>1106320 - 1106652                | 3 | - | hypothetical protein, conserved                      |

|     |         |         |       |               |                                        |   |   |                                                                     |
|-----|---------|---------|-------|---------------|----------------------------------------|---|---|---------------------------------------------------------------------|
| 104 | 1106726 | 1110234 | ChrIX | TGME49_066710 | 1105960 - 1106207<br>1106320 - 1106652 | 3 | + | NEK kinase                                                          |
| 105 | 1174840 | 1177532 | ChrIX | TGME49_066620 | 1180172 - 1180385                      | 1 | - | thioredoxin, putative                                               |
| 106 | 1313236 | 1314477 | ChrIX | TGME49_066330 | 1311016 - 1311428                      | 4 | + | hypothetical protein                                                |
| 107 | 1367867 | 1375705 | ChrIX | TGME49_066140 | 1376149 - 1376412                      | 4 | - | sterol-regulatory element binding protein site 2 protease, putative |
| 108 | 1564412 | 1576267 | ChrIX | TGME49_065770 | 1579698 - 1579853                      | 1 | - | hypothetical protein                                                |
| 109 | 1579895 | 1581051 | ChrIX | TGME49_065660 | 1579698 - 1579853                      | 1 | + | hypothetical protein                                                |
| 110 | 1704988 | 1705708 | ChrIX | TGME49_065350 | 1704956 - 1705381                      | 1 | + | acyl-CoA thioester hydrolase, putative                              |
| 111 | 1835316 | 1841872 | ChrIX | TGME49_065150 | 1842117 - 1842323<br>1843423 - 1843622 | 4 | - | hypothetical protein                                                |
| 112 | 1853426 | 1855521 | ChrIX | TGME49_065120 | 1852592 - 1852866<br>1853057 - 1853257 | 2 | + | hypothetical protein, conserved                                     |
| 113 | 2420233 | 2444533 | ChrIX | TGME49_088050 | 2445030 - 2445272                      | 2 | - | selective LIM-binding factor, putative                              |
| 114 | 2449033 | 2452272 | ChrIX | TGME49_088060 | 2445030 - 2445272                      | 2 | + | hypothetical protein, conserved                                     |
| 115 | 3173801 | 3175973 | ChrIX | TGME49_089210 | 3178447 - 3178812                      | 2 | - | prefoldin subunit, putative                                         |
| 116 | 3178861 | 3189830 | ChrIX | TGME49_089220 | 3178447 - 3178812                      | 2 | + | hypothetical protein                                                |
| 117 | 3424591 | 3430389 | ChrIX | TGME49_089580 | 3430932 - 3431258                      | 1 | - | strictosidine synthase domain-containing protein                    |
| 118 | 3465754 | 3469081 | ChrIX | TGME49_089680 | 3469577 - 3469788                      | 1 | - | Ras family domain-containing protein                                |
| 119 | 3759242 | 3760324 | ChrIX | TGME49_090250 | 3760918 - 3761172                      | 1 | - | hypothetical protein, conserved                                     |
| 120 | 3761022 | 3764123 | ChrIX | TGME49_090260 | 3760918 - 3761172                      | 1 | + | hypothetical protein, conserved                                     |
| 121 | 4323074 | 4323742 | ChrIX | TGME49_091300 | 4326039 - 4326281                      | 2 | - | RER1 protein, putative                                              |
| 122 | 4476664 | 4477092 | ChrIX | TGME49_091860 | 4477049 - 4477347                      | 2 | - | hypothetical protein                                                |
| 123 | 4477493 | 4481656 | ChrIX | TGME49_091870 | 4477049 - 4477347                      | 2 | + | hypothetical protein                                                |
| 124 | 4647791 | 4652267 | ChrIX | TGME49_092110 | 4647363 - 4647628                      | 1 | + | formate/nitrite transporter, putative                               |
| 125 | 4788369 | 4793296 | ChrIX | TGME49_092340 | 4784355 - 4784606<br>4787656 - 4788231 | 3 | + | zinc finger C3HC4 RING finger protein, putative                     |
| 126 | 4814054 | 4821550 | ChrIX | TGME49_092400 | 4811820 - 4812142                      | 1 | + | hypothetical protein                                                |
| 127 | 4863179 | 4868687 | ChrIX | TGME49_010470 | 4869985 - 4870226                      | 1 | - | hypothetical protein                                                |
| 128 | 5278853 | 5293914 | ChrIX | TGME49_105040 | 5294259 - 5294397                      | 1 | - | hypothetical protein                                                |

|     |         |         |       |               |                                        |   |   |                                                                   |
|-----|---------|---------|-------|---------------|----------------------------------------|---|---|-------------------------------------------------------------------|
| 129 | 5296237 | 5297812 | ChrIX | TGME49_105050 | 5294259 - 5294397                      | 1 | + | calmodulin, putative                                              |
| 130 | 5357374 | 5365489 | ChrIX | TGME49_105180 | 5366386 - 5366673                      | 1 | - | sodium/hydrogen exchanger, putative                               |
| 131 | 5689129 | 5691675 | ChrIX | TGME49_105800 | 5691847 - 5692048                      | 1 | - | hypothetical protein, conserved                                   |
| 132 | 5693087 | 5695576 | ChrIX | TGME49_105810 | 5691847 - 5692048                      | 1 | + | hypothetical protein                                              |
| 133 | 5703003 | 5704922 | ChrIX | TGME49_105830 | 5702064 - 5702329                      | 2 | + | EF hand family protein                                            |
| 134 | 5816290 | 5816979 | ChrIX | TGME49_106010 | 5813734 - 5814032                      | 3 | + | hypothetical protein                                              |
| 135 | 5849997 | 5856900 | ChrIX | TGME49_106030 | 5858363 - 5858664<br>5858789 - 5859040 | 2 | - | hypothetical protein                                              |
| 136 | 5929372 | 5937091 | ChrIX | TGME49_106220 | 5928557 - 5928794                      | 1 | + | formin binding protein, putative                                  |
| 137 | 6129484 | 6134961 | ChrIX | TGME49_106360 | 6128945 - 6129369                      | 3 | + | hypothetical protein                                              |
| 138 | 6199948 | 6203431 | ChrIX | TGME49_106470 | 6197979 - 6198392<br>6199646 - 6199923 | 4 | + | isoprenylcysteine carboxymethyltransferase, putative              |
| 139 | 31093   | 31808   | ChrV  | TGME49_096340 | 32589 - 32697                          | 1 | - | hypothetical protein                                              |
| 140 | 73339   | 79281   | ChrV  | TGME49_087500 | 79929 - 80125                          | 1 | - | TCP-1/cpn60 family chaperonin, putative                           |
| 141 | 147507  | 154164  | ChrV  | TGME49_020110 | 159085 - 159323<br>159867 - 160085     | 5 | - | hypothetical protein                                              |
| 142 | 161600  | 165051  | ChrV  | TGME49_020120 | 159085 - 159323<br>159867 - 160085     | 5 | + | hypothetical protein                                              |
| 143 | 257924  | 260232  | ChrV  | TGME49_020250 | 261282 - 261467                        | 1 | - | chloride channel, nucleotide-sensitive, 1A, putative              |
| 144 | 261635  | 263621  | ChrV  | TGME49_020260 | 261282 - 261467                        | 1 | + | hypothetical protein, conserved                                   |
| 145 | 265224  | 268338  | ChrV  | TGME49_020270 | 269444 - 269662                        | 1 | - | hypothetical protein, conserved                                   |
| 146 | 271238  | 275200  | ChrV  | TGME49_020280 | 269444 - 269662                        | 1 | + | SCP-like domain-containing protein                                |
| 147 | 533657  | 533729  | ChrV  | TGME49_012750 | 535626 - 535977                        | 1 | - | tRNA-Met                                                          |
| 148 | 606151  | 609069  | ChrV  | TGME49_012860 | 604684 - 604954                        | 2 | + | hypothetical protein                                              |
| 149 | 896709  | 900949  | ChrV  | TGME49_013340 | 901027 - 901205                        | 1 | - | glucose-methanol-choline oxidoreductase domain-containing protein |
| 150 | 1205210 | 1217429 | ChrV  | TGME49_013720 | 1219889 - 1220250                      | 1 | - | hypothetical protein                                              |
| 151 | 1736410 | 1737967 | ChrV  | TGME49_086550 | 1735024 - 1735327<br>1735335 - 1735664 | 2 | + | hypothetical protein, conserved                                   |
| 152 | 1867429 | 1873533 | ChrV  | TGME49_086210 | 1874410 - 1874696                      | 2 | - | serine/threonine protein phosphatase, putative                    |
| 153 | 1918208 | 1922116 | ChrV  | TGME49_086130 | 1922340 - 1922704                      | 1 | - | hypothetical protein                                              |

|     |         |         |       |               |                                        |   |   |                                                                           |
|-----|---------|---------|-------|---------------|----------------------------------------|---|---|---------------------------------------------------------------------------|
| 154 | 2064055 | 2064126 | ChrV  | TGME49_085960 | 2063130 - 2063312                      | 1 | + | tRNA-Pro                                                                  |
| 155 | 2233388 | 2236549 | ChrV  | TGME49_085690 | 2236505 - 2236722                      | 2 | - | notch DSL domain-containing protein                                       |
| 156 | 2238517 | 2241643 | ChrV  | TGME49_085680 | 2236505 - 2236722                      | 2 | + | dihydrolipoamide acyltransferase, putative                                |
| 157 | 2243969 | 2245478 | ChrV  | TGME49_085670 | 2247717 - 2248018<br>2249266 - 2249573 | 5 | - | hypothetical protein                                                      |
| 158 | 2249917 | 2266294 | ChrV  | TGME49_085660 | 2247717 - 2248018<br>2249266 - 2249573 | 5 | + | DEAD/DEAH box helicase domain-containing protein                          |
| 159 | 2585632 | 2587209 | ChrV  | TGME49_084660 | 2583460 - 2583757<br>2584283 - 2584521 | 4 | + | hypothetical protein, conserved                                           |
| 160 | 2680813 | 2683091 | ChrV  | TGME49_084540 | 2684157 - 2684440                      | 2 | - | ATP synthase subunit O, putative                                          |
| 161 | 2684896 | 2689058 | ChrV  | TGME49_084530 | 2684157 - 2684440                      | 2 | + | hypothetical protein                                                      |
| 162 | 2916593 | 2918813 | ChrV  | TGME49_083790 | 2921175 - 2921358                      | 1 | - | protein kinase                                                            |
| 163 | 43243   | 44019   | ChrVI | TGME49_038060 | 41688 - 41868                          | 1 | + | EF-hand domain-containing protein                                         |
| 164 | 237949  | 238503  | ChrVI | TGME49_038460 | 238528 - 238723                        | 1 | - | SRS22B                                                                    |
| 165 | 266959  | 267507  | ChrVI | TGME49_038630 | 267407 - 267707                        | 3 | - | SRS22H                                                                    |
| 166 | 268023  | 268490  | ChrVI | TGME49_038640 | 267407 - 267707                        | 3 | + | hypothetical protein                                                      |
| 167 | 520543  | 526732  | ChrVI | TGME49_039290 | 527497 - 527707                        | 1 | - | hypothetical protein                                                      |
| 168 | 531956  | 538662  | ChrVI | TGME49_039300 | 527497 - 527707                        | 1 | + | hypothetical protein                                                      |
| 169 | 746233  | 750035  | ChrVI | TGME49_039540 | 750539 - 750846                        | 1 | - | LEM3 / CDC50 family protein                                               |
| 170 | 755180  | 756882  | ChrVI | TGME49_039550 | 750539 - 750846                        | 1 | + | roadblock/LC7 domain-containing protein                                   |
| 171 | 1009780 | 1012273 | ChrVI | TGME49_039920 | 1009155 - 1009456                      | 1 | + | hypothetical protein, conserved                                           |
| 172 | 1350347 | 1353751 | ChrVI | TGME49_040640 | 1346114 - 1346418                      | 1 | + | Casein kinase one CK1 TgCK1a                                              |
| 173 | 1633296 | 1634372 | ChrVI | TGME49_041130 | 1631224 - 1631428                      | 1 | + | hypothetical protein                                                      |
| 174 | 1885439 | 1886940 | ChrVI | TGME49_042120 | 1884413 - 1885023                      | 6 | + | hypothetical protein                                                      |
| 175 | 1952175 | 1954344 | ChrVI | TGME49_042350 | 1954577 - 1954818                      | 2 | - | TPR Domain containing protein                                             |
| 176 | 2051944 | 2054889 | ChrVI | TGME49_042580 | 2054879 - 2055104                      | 1 | - | iron only hydrogenase large subunit, C-terminal domain-containing protein |
| 177 | 2055330 | 2056983 | ChrVI | TGME49_042590 | 2054879 - 2055104                      | 1 | + | hypothetical protein                                                      |
| 178 | 2069805 | 2072364 | ChrVI | TGME49_042600 | 2074425 - 2074639                      | 1 | - | 6-phosphogluconate dehydrogenase, putative                                |
| 179 | 2456839 | 2458481 | ChrVI | TGME49_043260 | 2458527 - 2458857                      | 1 | - | hypothetical protein                                                      |

|     |         |         |         |               |                                                             |   |   |                                                               |
|-----|---------|---------|---------|---------------|-------------------------------------------------------------|---|---|---------------------------------------------------------------|
| 180 | 2564287 | 2570176 | ChrVI   | TGME49_043380 | 2562643 - 2562925                                           | 1 | + | hypothetical protein                                          |
| 181 | 2782604 | 2786727 | ChrVI   | TGME49_043720 | 2786502 - 2786760                                           | 2 | - | peroxisomal biogenesis factor 11 domain-containing protein    |
| 182 | 2788570 | 2793124 | ChrVI   | TGME49_043730 | 2786502 - 2786760                                           | 2 | + | p36 protein                                                   |
| 183 | 2821310 | 2821789 | ChrVI   | TGME49_043770 | 2822985 - 2823255                                           | 1 | - | hypothetical protein                                          |
| 184 | 2824146 | 2826080 | ChrVI   | TGME49_043780 | 2822985 - 2823255                                           | 1 | + | hypothetical protein                                          |
| 185 | 2863906 | 2870659 | ChrVI   | TGME49_043930 | 2871989 - 2872140                                           | 2 | - | hypothetical protein                                          |
| 186 | 2939199 | 2941289 | ChrVI   | TGME49_044030 | 2936567 - 2936917<br>2937800 - 2938075<br>2938879 - 2939119 | 5 | + | hypothetical protein                                          |
| 187 | 3192703 | 3198834 | ChrVI   | TGME49_044380 | 3199311 - 3199644<br>3200413 - 3200782                      | 2 | - | hypothetical protein, conserved                               |
| 188 | 3200507 | 3206948 | ChrVI   | TGME49_044390 | 3209694 - 3209978                                           | 1 | - | coatomer epsilon subunit, putative                            |
| 189 | 3210158 | 3211987 | ChrVI   | TGME49_044400 | 3209694 - 3209978                                           | 1 | + | hypothetical protein                                          |
| 190 | 3249193 | 3254642 | ChrVI   | TGME49_044460 | 3258007 - 3258270<br>3259168 - 3259378                      | 6 | - | hypothetical protein                                          |
| 191 | 456639  | 459632  | ChrVIIa | TGME49_080380 | 455672 - 455937                                             | 1 | + | non-transmembrane antigen                                     |
| 192 | 481882  | 485310  | ChrVIIa | TGME49_104470 | 486418 - 486653                                             | 1 | - | oxidoreductase, putative                                      |
| 193 | 487731  | 489669  | ChrVIIa | TGME49_104480 | 486418 - 486653                                             | 1 | + | 3-oxo-5 alpha-steroid delta 4-dehydrogenase alpha 2, putative |
| 194 | 583917  | 587600  | ChrVIIa | TGME49_104670 | 587539 - 587638                                             | 1 | - | internalin, putative                                          |
| 195 | 697825  | 707630  | ChrVIIa | TGME49_006670 | 710329 - 710542                                             | 3 | - | hypothetical protein                                          |
| 196 | 712777  | 713943  | ChrVIIa | TGME49_006660 | 710329 - 710542                                             | 3 | + | hypothetical protein                                          |
| 197 | 737932  | 739635  | ChrVIIa | TGME49_006630 | 742589 - 742856                                             | 1 | - | hypothetical protein                                          |
| 198 | 745471  | 747573  | ChrVIIa | TGME49_006620 | 742589 - 742856                                             | 1 | + | hypothetical protein                                          |
| 199 | 979933  | 981574  | ChrVIIa | TGME49_006410 | 976536 - 976654                                             | 1 | + | hypothetical protein                                          |
| 200 | 1164398 | 1167777 | ChrVIIa | TGME49_005720 | 1168390 - 1168588                                           | 1 | - | adenosine/AMP deaminase domain containing protein             |
| 201 | 1168932 | 1173906 | ChrVIIa | TGME49_005710 | 1168390 - 1168588                                           | 1 | + | lysyl-tRNA synthetase, putative                               |
| 202 | 1220769 | 1238439 | ChrVIIa | TGME49_005620 | 1239155 - 1239458                                           | 1 | - | hypothetical protein                                          |



|     |         |         |         |               |                                        |   |   |                                                                |
|-----|---------|---------|---------|---------------|----------------------------------------|---|---|----------------------------------------------------------------|
| 203 | 1240675 | 1241130 | ChrVIIa | TGME49_005610 | 1239155 - 1239458                      | 1 | + | hypothetical protein, conserved                                |
| 204 | 1444700 | 1444779 | ChrVIIa | TGME49_005310 | 1443586 - 1443820                      | 1 | + | tRNA-Leu                                                       |
| 205 | 1543140 | 1550619 | ChrVIIa | TGME49_005150 | 1541025 - 1541304                      | 1 | + | hypothetical protein                                           |
| 206 | 1561036 | 1587512 | ChrVIIa | TGME49_005130 | 1558202 - 1558315<br>1558711 - 1559036 | 2 | + | glyoxalase, putative                                           |
| 207 | 1649021 | 1650207 | ChrVIIa | TGME49_004890 | 1648823 - 1649109                      | 1 | + | hypothetical protein                                           |
| 208 | 1659087 | 1660811 | ChrVIIa | TGME49_004870 | 1661564 - 1661770                      | 1 | - | hypothetical protein                                           |
| 209 | 1663586 | 1686354 | ChrVIIa | TGME49_004560 | 1661564 - 1661770                      | 1 | + | type I fatty acid synthase, putative                           |
| 210 | 1769067 | 1776641 | ChrVIIa | TGME49_004410 | 1776877 - 1777073                      | 1 | - | endonuclease/exonuclease/phosphatase domain-containing protein |
| 211 | 1780178 | 1787919 | ChrVIIa | TGME49_004400 | 1776877 - 1777073                      | 1 | + | ATP synthase alpha chain, putative                             |
| 212 | 1815600 | 1822592 | ChrVIIa | TGME49_004360 | 1814784 - 1815049                      | 1 | + | subtilase family serine protease, putative                     |
| 213 | 2017894 | 2018652 | ChrVIIa | TGME49_004000 | 2018871 - 2019182<br>2020042 - 2020397 | 2 | - | hypothetical protein                                           |
| 214 | 2097789 | 2104823 | ChrVIIa | TGME49_003910 | 2106240 - 2106545                      | 1 | - | TBC domain-containing protein                                  |
| 215 | 2135043 | 2139503 | ChrVIIa | TGME49_003870 | 2139692 - 2140012                      | 1 | - | isy1-like splicing family domain-containing protein            |
| 216 | 2347324 | 2350929 | ChrVIIa | TGME49_003640 | 2355324 - 2355514<br>2356062 - 2356302 | 2 | - | hypothetical protein                                           |
| 217 | 2375607 | 2376896 | ChrVIIa | TGME49_003590 | 2377776 - 2377964                      | 1 | - | hypothetical protein                                           |
| 218 | 2380855 | 2383638 | ChrVIIa | TGME49_003580 | 2377776 - 2377964                      | 1 | + | NAD-binding domain-containing protein                          |
| 219 | 2395888 | 2397120 | ChrVIIa | TGME49_003560 | 2397184 - 2397521                      | 1 | - | hypothetical protein                                           |
| 220 | 2769464 | 2772044 | ChrVIIa | TGME49_003110 | 2772467 - 2772748<br>2773792 - 2774003 | 3 | - | citrate synthase, putative                                     |
| 221 | 2773899 | 2774446 | ChrVIIa | TGME49_003100 | 2772467 - 2772748<br>2773792 - 2774003 | 3 | + | hypothetical protein                                           |
| 222 | 2785341 | 2787695 | ChrVIIa | TGME49_003060 | 2788249 - 2788510<br>2790344 - 2790611 | 3 | - | hypothetical protein, conserved                                |
| 223 | 2790918 | 2798241 | ChrVIIa | TGME49_003050 | 2788249 - 2788510<br>2790344 - 2790611 | 3 | + | hypothetical protein, conserved                                |
| 224 | 2945749 | 2954184 | ChrVIIa | TGME49_002850 | 2942797 - 2943071                      | 1 | + | hypothetical protein                                           |

|     |         |         |         |               |                                        |   |   |                                                                                         |
|-----|---------|---------|---------|---------------|----------------------------------------|---|---|-----------------------------------------------------------------------------------------|
| 225 | 3452253 | 3458454 | ChrVIIa | TGME49_002240 | 3460367 - 3460737                      | 1 | - | hypothetical protein                                                                    |
| 226 | 3462455 | 3471812 | ChrVIIa | TGME49_002230 | 3460367 - 3460737                      | 1 | + | histone deactylase, putative                                                            |
| 227 | 3923179 | 3932058 | ChrVIIa | TGME49_001220 | 3934453 - 3934715                      | 1 | - | hypothetical protein                                                                    |
| 228 | 4326121 | 4328823 | ChrVIIa | TGME49_082050 | 4328721 - 4329032                      | 6 | - | hypothetical protein                                                                    |
| 229 | 4383515 | 4385589 | ChrVIIa | TGME49_082160 | 4383170 - 4383458                      | 1 | + | hypothetical protein                                                                    |
| 230 | 78151   | 81029   | ChrVIIb | TGME49_064200 | 83970 - 84179                          | 1 | - | hypothetical protein                                                                    |
| 231 | 84414   | 90748   | ChrVIIb | TGME49_064190 | 83970 - 84179                          | 1 | + | hypothetical protein                                                                    |
| 232 | 128367  | 129795  | ChrVIIb | TGME49_064150 | 129943 - 130086                        | 1 | - | hypothetical protein                                                                    |
| 233 | 268239  | 275853  | ChrVIIb | TGME49_063870 | 276153 - 276326                        | 1 | - | glutamyl-tRNA synthetase, putative                                                      |
| 234 | 276801  | 280519  | ChrVIIb | TGME49_063860 | 276153 - 276326                        | 1 | + | hypothetical protein                                                                    |
| 235 | 574071  | 574974  | ChrVIIb | TGME49_063400 | 577720 - 577935                        | 1 | - | hypothetical protein                                                                    |
| 236 | 577912  | 582741  | ChrVIIb | TGME49_063390 | 577720 - 577935                        | 1 | + | hypothetical protein                                                                    |
| 237 | 856582  | 867347  | ChrVIIb | TGME49_063000 | 855468 - 855751                        | 1 | + | hypothetical protein, conserved                                                         |
| 238 | 868948  | 873827  | ChrVIIb | TGME49_062990 | 876380 - 876725                        | 1 | - | hypothetical protein                                                                    |
| 239 | 877377  | 880550  | ChrVIIb | TGME49_062980 | 876380 - 876725                        | 1 | + | hypothetical protein                                                                    |
| 240 | 1590113 | 1597110 | ChrVIIb | TGME49_061660 | 1596865 - 1597286<br>1600627 - 1600967 | 2 | - | hypothetical protein                                                                    |
| 241 | 1965294 | 1970821 | ChrVIIb | TGME49_061010 | 1971900 - 1972172                      | 1 | - | 26S protease regulatory subunit 8, putative                                             |
| 242 | 1972204 | 1980585 | ChrVIIb | TGME49_061000 | 1971900 - 1972172                      | 1 | + | DNA mismatch repair protein, putative                                                   |
| 243 | 2121627 | 2131574 | ChrVIIb | TGME49_060600 | 2121426 - 2121838                      | 1 | + | pumilio-family RNA binding repeat domain-containing protein                             |
| 244 | 2139081 | 2143978 | ChrVIIb | TGME49_060580 | 2138912 - 2139146<br>2300897 - 2301127 | 2 | + | hypothetical protein                                                                    |
| 245 | 2302848 | 2303943 | ChrVIIb | TGME49_060400 | 2302724 - 2302925                      | 2 | + | hypothetical protein                                                                    |
| 246 | 2628349 | 2632303 | ChrVIIb | TGME49_059880 | 2633151 - 2633375                      | 1 | - | hypothetical protein                                                                    |
| 247 | 2634917 | 2641526 | ChrVIIb | TGME49_059870 | 2633151 - 2633375                      | 1 | + | hypothetical protein                                                                    |
| 248 | 2776228 | 2783809 | ChrVIIb | TGME49_059530 | 2775771 - 2776031                      | 1 | + | UDP-N-acetyl-D-galactosamine:polypeptide N-acetylgalactosaminyltransferase T1, putative |
| 249 | 2796363 | 2797667 | ChrVIIb | TGME49_059300 | 2796234 - 2796410                      | 1 | + | SRS26B                                                                                  |

|     |         |         |         |               |                                                             |   |   |                                              |
|-----|---------|---------|---------|---------------|-------------------------------------------------------------|---|---|----------------------------------------------|
| 250 | 2879560 | 2885879 | ChrVIIb | TGME49_059190 | 2886649 - 2886899<br>2887093 - 2887313                      | 7 | - | hypothetical protein                         |
| 251 | 3095433 | 3100813 | ChrVIIb | TGME49_058870 | 3102829 - 3103005                                           | 2 | - | hypothetical protein                         |
| 252 | 3104472 | 3108784 | ChrVIIb | TGME49_058860 | 3102829 - 3103005                                           | 2 | + | hypothetical protein                         |
| 253 | 3224947 | 3233900 | ChrVIIb | TGME49_058700 | 3234335 - 3234589                                           | 1 | - | hypothetical protein                         |
| 254 | 3389529 | 3391443 | ChrVIIb | TGME49_058460 | 3391309 - 3391687<br>3392162 - 3392385<br>3394263 - 3394477 | 4 | - | hypothetical protein                         |
| 255 | 3396069 | 3402026 | ChrVIIb | TGME49_058450 | 3391309 - 3391687<br>3392162 - 3392385<br>3394263 - 3394477 | 4 | + | hypothetical protein, conserved              |
| 256 | 3914473 | 3915462 | ChrVIIb | TGME49_057570 | 3917092 - 3917310                                           | 1 | - | hypothetical protein                         |
| 257 | 3919401 | 3922962 | ChrVIIb | TGME49_057560 | 3917092 - 3917310                                           | 1 | + | WD domain, G-beta repeat-containing protein  |
| 258 | 3938035 | 3941620 | ChrVIIb | TGME49_057530 | 3944102 - 3944388                                           | 1 | - | hypothetical protein, conserved              |
| 259 | 3944715 | 3947336 | ChrVIIb | TGME49_057520 | 3944102 - 3944388                                           | 1 | + | synaptobrevin-like protein, putative         |
| 260 | 4034671 | 4040853 | ChrVIIb | TGME49_057370 | 4031749 - 4032090<br>4032203 - 4032447<br>4033790 - 4034058 | 3 | + | hypothetical protein                         |
| 261 | 4077270 | 4077761 | ChrVIIb | TGME49_057320 | 4077790 - 4078077                                           | 1 | - | hypothetical protein                         |
| 262 | 4080760 | 4082443 | ChrVIIb | TGME49_057310 | 4077790 - 4078077                                           | 1 | + | nuclear movement domain-containing protein   |
| 263 | 4153427 | 4160894 | ChrVIIb | TGME49_057120 | 4163841 - 4164123                                           | 2 | - | glucose transporter, putative                |
| 264 | 4614696 | 4617602 | ChrVIIb | TGME49_055750 | 4617802 - 4618053                                           | 6 | - | hypothetical protein                         |
| 265 | 4768707 | 4771213 | ChrVIIb | TGME49_055420 | 4772102 - 4772215<br>4772549 - 4772688                      | 2 | - | hypothetical protein                         |
| 266 | 6252    | 8709    | ChrVIII | TGME49_028990 | 9345 - 9678                                                 | 1 | - | zinc finger CCCH type protein, putative      |
| 267 | 44269   | 49910   | ChrVIII | TGME49_029140 | 51658 - 51913<br>52354 - 52578                              | 2 | - | peroxisomal multifunctional enzyme, putative |
| 268 | 53314   | 57291   | ChrVIII | TGME49_029150 | 58910 - 59162<br>59610 - 59922                              | 2 | - | sugar permease, putative                     |
| 269 | 59807   | 62205   | ChrVIII | TGME49_029160 | 58910 - 59162<br>59610 - 59922                              | 2 | + | zinc finger DHHC domain-containing protein   |

|     |         |         |         |               |                                                                          |   |   |                                                                |
|-----|---------|---------|---------|---------------|--------------------------------------------------------------------------|---|---|----------------------------------------------------------------|
| 270 | 164574  | 165518  | ChrVIII | TGME49_029320 | 166222 - 166521                                                          | 2 | - | haloacid dehalogenase-like hydrolase domain-containing protein |
| 271 | 166682  | 168259  | ChrVIII | TGME49_029330 | 169149 - 169451<br>169506 - 169739                                       | 2 | - | haloacid dehalogenase-like hydrolase domain containing protein |
| 272 | 252746  | 258824  | ChrVIII | TGME49_029440 | 258624 - 258990                                                          | 2 | - | zinc finger C3HC4 type RING finger protein, putative           |
| 273 | 369324  | 369869  | ChrVIII | TGME49_029660 | 369895 - 370128                                                          | 1 | - | hypothetical protein                                           |
| 274 | 369947  | 373222  | ChrVIII | TGME49_029670 | 369895 - 370128                                                          | 1 | + | ribosomal protein S23, putative                                |
| 275 | 483347  | 490479  | ChrVIII | TGME49_029950 | 481836 - 481997                                                          | 1 | + | 26S protease regulatory subunit 6b, putative                   |
| 276 | 547585  | 553795  | ChrVIII | TGME49_030020 | 556048 - 556301                                                          | 1 | - | kinesin motor domain-containing protein                        |
| 277 | 799153  | 805460  | ChrVIII | TGME49_030460 | 805813 - 806183                                                          | 1 | - | dpy-30 motif-containing protein                                |
| 278 | 807853  | 809229  | ChrVIII | TGME49_030470 | 805813 - 806183                                                          | 1 | + | Rhoptry kinase family protein ROP46, putative                  |
| 279 | 925048  | 927046  | ChrVIII | TGME49_030640 | 927522 - 927658                                                          | 1 | - | hypothetical protein                                           |
| 280 | 928006  | 932862  | ChrVIII | TGME49_030650 | 927522 - 927658                                                          | 1 | + | hypothetical protein                                           |
| 281 | 936868  | 941815  | ChrVIII | TGME49_030660 | 942934 - 943177<br>947443 - 947666<br>950362 - 950631<br>950904 - 951333 | 7 | - | hypothetical protein                                           |
| 282 | 953116  | 956220  | ChrVIII | TGME49_030670 | 942934 - 943177<br>947443 - 947666<br>950362 - 950631<br>950904 - 951333 | 7 | + | tubulin-tyrosine ligase family domain-containing protein       |
| 283 | 962262  | 965903  | ChrVIII | TGME49_030680 | 966983 - 967378                                                          | 4 | - | hypothetical protein                                           |
| 284 | 1113367 | 1117268 | ChrVIII | TGME49_030930 | 1111831 - 1112095                                                        | 3 | + | hypothetical protein                                           |
| 285 | 1231396 | 1232816 | ChrVIII | TGME49_031090 | 1232941 - 1233130                                                        | 2 | - | hypothetical protein                                           |
| 286 | 1235672 | 1240297 | ChrVIII | TGME49_031100 | 1232941 - 1233130                                                        | 2 | + | hypothetical protein                                           |
| 287 | 1326442 | 1334647 | ChrVIII | TGME49_031210 | 1334670 - 1334890                                                        | 2 | - | EH protein, putative                                           |
| 288 | 1337354 | 1340086 | ChrVIII | TGME49_031220 | 1334670 - 1334890                                                        | 2 | + | hypothetical protein                                           |
| 289 | 1375148 | 1384475 | ChrVIII | TGME49_031370 | 1385713 - 1385988<br>1387610 - 1387965                                   | 3 | - | patatin-like phospholipase domain-containing protein           |
| 290 | 1388087 | 1389872 | ChrVIII | TGME49_031380 | 1385713 - 1385988<br>1387610 - 1387965                                   | 3 | + | DNA-directed RNA polymerase II, putative                       |

|     |         |         |         |               |                                        |   |   |                                                                                                         |
|-----|---------|---------|---------|---------------|----------------------------------------|---|---|---------------------------------------------------------------------------------------------------------|
| 291 | 1621395 | 1626032 | ChrVIII | TGME49_031900 | 1626554 - 1626892                      | 1 | - | acyl-CoA dehydrogenase, putative                                                                        |
| 292 | 1628325 | 1634005 | ChrVIII | TGME49_031910 | 1626554 - 1626892                      | 1 | + | ATP synthase gama chain, putative                                                                       |
| 293 | 1650511 | 1655336 | ChrVIII | TGME49_031930 | 1655642 - 1655856                      | 1 | - | hypothetical protein                                                                                    |
| 294 | 1657931 | 1663056 | ChrVIII | TGME49_031940 | 1655642 - 1655856                      | 1 | + | thiF family domain-containing protein                                                                   |
| 295 | 2031756 | 2045829 | ChrVIII | TGME49_032360 | 2046265 - 2046479                      | 1 | - | RNA polymerase Rpb1 C-terminal repeat domain-containing protein / exonuclease domain-containing protein |
| 296 | 2114029 | 2115942 | ChrVIII | TGME49_032480 | 2113691 - 2114009                      | 2 | + | paramyosin, putative                                                                                    |
| 297 | 2316541 | 2330422 | ChrVIII | TGME49_033000 | 2331439 - 2331771<br>2332075 - 2332383 | 4 | - | supt5h protein, putative                                                                                |
| 298 | 2335952 | 2341851 | ChrVIII | TGME49_033010 | 2331439 - 2331771<br>2332075 - 2332383 | 4 | + | CMGC kinase, MAPK family TgMAPK2                                                                        |
| 299 | 2555557 | 2556822 | ChrVIII | TGME49_033270 | 2557702 - 2557904                      | 1 | - | MORN repeat-containing protein                                                                          |
| 300 | 2874367 | 2874440 | ChrVIII | TGME49_033880 | 2874629 - 2874909                      | 4 | - | tRNA-Ile                                                                                                |
| 301 | 3235003 | 3236460 | ChrVIII | TGME49_073810 | 3234978 - 3235200                      | 6 | + | hypothetical protein                                                                                    |
| 302 | 3294496 | 3298369 | ChrVIII | TGME49_073740 | 3298158 - 3298479<br>3299293 - 3299625 | 3 | - | acetyl-CoA acyltransferase B, putative                                                                  |
| 303 | 3299360 | 3301867 | ChrVIII | TGME49_073730 | 3303195 - 3303422                      | 5 | - | hypothetical protein                                                                                    |
| 304 | 3835977 | 3837656 | ChrVIII | TGME49_072620 | 3837995 - 3838327                      | 1 | - | hypothetical protein                                                                                    |
| 305 | 3968791 | 3975902 | ChrVIII | TGME49_072430 | 3976744 - 3976936                      | 1 | - | membrane-attack complex / perforin domain-containing protein                                            |
| 306 | 4316738 | 4327323 | ChrVIII | TGME49_071870 | 4327763 - 4327951                      | 1 | - | zinc carboxypeptidase, putative                                                                         |
| 307 | 4513724 | 4514770 | ChrVIII | TGME49_071390 | 4513327 - 4513563                      | 1 | + | hypothetical protein, conserved                                                                         |
| 308 | 4548485 | 4556098 | ChrVIII | TGME49_071350 | 4556279 - 4556488                      | 1 | - | folylpolyglutamate synthase, putative                                                                   |
| 309 | 4557758 | 4559210 | ChrVIII | TGME49_071340 | 4556279 - 4556488                      | 1 | + | hypothetical protein, conserved                                                                         |
| 310 | 4725115 | 4730553 | ChrVIII | TGME49_071090 | 4733501 - 4733703                      | 1 | - | hypothetical protein                                                                                    |
| 311 | 4735900 | 4736454 | ChrVIII | TGME49_071080 | 4733501 - 4733703                      | 1 | + | hypothetical protein                                                                                    |
| 312 | 4825698 | 4826306 | ChrVIII | TGME49_070970 | 4827197 - 4827578                      | 2 | - | hypothetical protein                                                                                    |
| 313 | 4829004 | 4835615 | ChrVIII | TGME49_070960 | 4827197 - 4827578                      | 2 | + | hypothetical protein                                                                                    |
| 314 | 5065533 | 5078433 | ChrVIII | TGME49_070690 | 5080449 - 5080706                      | 1 | - | hypothetical protein, conserved                                                                         |

|     |         |         |         |               |                                        |   |   |                                                    |
|-----|---------|---------|---------|---------------|----------------------------------------|---|---|----------------------------------------------------|
| 315 | 5081039 | 5081791 | ChrVIII | TGME49_070680 | 5080449 - 5080706                      | 1 | + | hypothetical protein                               |
| 316 | 5310228 | 5319586 | ChrVIII | TGME49_070230 | 5321164 - 5321451                      | 1 | - | hypothetical protein                               |
| 317 | 5321889 | 5326207 | ChrVIII | TGME49_070220 | 5321164 - 5321451                      | 1 | + | hypothetical protein                               |
| 318 | 5586395 | 5586466 | ChrVIII | TGME49_069810 | 5585962 - 5586150                      | 1 | + | tRNA-Trp                                           |
| 319 | 5593926 | 5593997 | ChrVIII | TGME49_069790 | 5593238 - 5593490                      | 1 | + | tRNA-Pro                                           |
| 320 | 5878583 | 5883172 | ChrVIII | TGME49_069340 | 5883032 - 5883321                      | 1 | - | hypothetical protein                               |
| 321 | 5883542 | 5887885 | ChrVIII | TGME49_069330 | 5883032 - 5883321                      | 1 | + | hypothetical protein, conserved                    |
| 322 | 5945684 | 5947008 | ChrVIII | TGME49_069270 | 5945059 - 5945291                      | 1 | + | leucine rich repeat protein, putative              |
| 323 | 5975785 | 5975857 | ChrVIII | TGME49_069220 | 5975855 - 5976046                      | 1 | - | tRNA-Lys                                           |
| 324 | 5977793 | 5982928 | ChrVIII | TGME49_069210 | 5975855 - 5976046                      | 1 | + | hypothetical protein                               |
| 325 | 6027809 | 6029575 | ChrVIII | TGME49_069170 | 6029777 - 6029967                      | 1 | - | hypothetical protein                               |
| 326 | 6088312 | 6097485 | ChrVIII | TGME49_069060 | 6086637 - 6086939                      | 1 | + | hypothetical protein                               |
| 327 | 6245895 | 6248259 | ChrVIII | TGME49_068850 | 6249150 - 6249365                      | 1 | - | enolase                                            |
| 328 | 6363482 | 6366786 | ChrVIII | TGME49_068680 | 6366551 - 6366835                      | 1 | - | hypothetical protein                               |
| 329 | 6367482 | 6367984 | ChrVIII | TGME49_068670 | 6366551 - 6366835                      | 1 | + | hypothetical protein                               |
| 330 | 6753636 | 6754857 | ChrVIII | TGME49_000230 | 6755316 - 6755614                      | 2 | - | PAN domain-containing protein                      |
| 331 | 6769176 | 6772022 | ChrVIII | TGME49_000280 | 6773438 - 6773670                      | 1 | - | WD-repeat protein, putative                        |
| 332 | 6774168 | 6778232 | ChrVIII | TGME49_000290 | 6773438 - 6773670                      | 1 | + | rhomboid family domain-containing protein          |
| 333 | 6825330 | 6830302 | ChrVIII | TGME49_000370 | 6832922 - 6833202                      | 3 | - | protein farnesyltransferase beta subunit, putative |
| 334 | 218717  | 220698  | ChrX    | TGME49_028630 | 216387 - 216503                        | 1 | + | hypothetical protein                               |
| 335 | 499336  | 501218  | ChrX    | TGME49_028140 | 497311 - 497664                        | 1 | + | hypothetical protein                               |
| 336 | 506421  | 524588  | ChrX    | TGME49_028120 | 503892 - 504155                        | 1 | + | hypothetical protein                               |
| 337 | 718399  | 722093  | ChrX    | TGME49_027850 | 723746 - 723994                        | 1 | - | RNA recognition motif-containing protein           |
| 338 | 725423  | 732139  | ChrX    | TGME49_027840 | 723746 - 723994                        | 1 | + | hypothetical protein                               |
| 339 | 846996  | 852420  | ChrX    | TGME49_027580 | 854124 - 854359                        | 1 | - | hypothetical protein                               |
| 340 | 987952  | 990477  | ChrX    | TGME49_027290 | 991624 - 991801                        | 1 | - | histone deacetylase, putative                      |
| 341 | 1172628 | 1189179 | ChrX    | TGME49_026910 | 1190876 - 1191059<br>1193147 - 1193397 | 4 | - | glycogen debranching enzyme, putative              |

|     |         |         |      |               |                                                             |   |   |                                                         |
|-----|---------|---------|------|---------------|-------------------------------------------------------------|---|---|---------------------------------------------------------|
| 342 | 1316022 | 1320668 | ChrX | TGME49_026770 | 1320727 - 1320908                                           | 1 | - | cGMP-inhibited 3',5'-cyclic phosphodiesterase, putative |
| 343 | 1324689 | 1330010 | ChrX | TGME49_026750 | 1332505 - 1332688                                           | 1 | - | hypothetical protein                                    |
| 344 | 1334783 | 1342207 | ChrX | TGME49_026740 | 1332505 - 1332688                                           | 1 | + | zinc finger C3HC4 RING finger protein, putative         |
| 345 | 1344726 | 1352360 | ChrX | TGME49_026730 | 1352801 - 1352920                                           | 1 | - | aconitate hydratase, putative                           |
| 346 | 1355973 | 1358203 | ChrX | TGME49_026720 | 1352801 - 1352920                                           | 1 | + | translin, putative                                      |
| 347 | 1504043 | 1514501 | ChrX | TGME49_026510 | 1515571 - 1515862<br>1516493 - 1516669                      | 3 | - | sec23/Sec24 helical domain-containing protein           |
| 348 | 1518245 | 1520644 | ChrX | TGME49_026500 | 1515571 - 1515862<br>1516493 - 1516669                      | 3 | + | hypothetical protein                                    |
| 349 | 1717830 | 1719597 | ChrX | TGME49_026240 | 1720442 - 1720663                                           | 1 | - | zinc finger protein, putative                           |
| 350 | 1721028 | 1722578 | ChrX | TGME49_026230 | 1720442 - 1720663                                           | 1 | + | hypothetical protein                                    |
| 351 | 1807930 | 1812343 | ChrX | TGME49_026020 | 1813801 - 1814094                                           | 1 | - | transmembrane domain-containing protein                 |
| 352 | 1813867 | 1815235 | ChrX | TGME49_026010 | 1813801 - 1814094                                           | 1 | + | pterin-4a-carbinolamine dehydratase                     |
| 353 | 1976021 | 1979658 | ChrX | TGME49_025800 | 1979493 - 1979758                                           | 2 | - | ABC transporter, putative                               |
| 354 | 1982363 | 1985719 | ChrX | TGME49_025790 | 1979493 - 1979758                                           | 2 | + | hypothetical protein                                    |
| 355 | 1994419 | 2003742 | ChrX | TGME49_025770 | 2004515 - 2005058<br>2005294 - 2005527<br>2007358 - 2007639 | 5 | - | Tyrosine kinase-like TKL protein                        |
| 356 | 2010004 | 2014840 | ChrX | TGME49_025760 | 2004515 - 2005058<br>2005294 - 2005527<br>2007358 - 2007639 | 5 | + | hypothetical protein                                    |
| 357 | 2322892 | 2327135 | ChrX | TGME49_025240 | 2321007 - 2321274<br>2321401 - 2321835                      | 5 | + | 50s ribosomal protein L13, putative                     |
| 358 | 2331215 | 2333622 | ChrX | TGME49_025230 | 2336656 - 2337062                                           | 3 | - | hypothetical protein                                    |
| 359 | 2438494 | 2442939 | ChrX | TGME49_025110 | 2436166 - 2436419                                           | 1 | + | hypothetical protein                                    |
| 360 | 2497906 | 2500692 | ChrX | TGME49_025050 | 2501123 - 2501270<br>2505784 - 2506019                      | 2 | - | adenosylhomocysteinase, putative                        |
| 361 | 2506109 | 2519517 | ChrX | TGME49_025030 | 2501123 - 2501270<br>2505784 - 2506019                      | 2 | + | myosin heavy chain, putative                            |
| 362 | 2771634 | 2772812 | ChrX | TGME49_024790 | 2773754 - 2774032                                           | 2 | - | SRS40A                                                  |

|     |         |         |      |               |                                        |   |   |                                                |
|-----|---------|---------|------|---------------|----------------------------------------|---|---|------------------------------------------------|
| 363 | 2805625 | 2808600 | ChrX | TGME49_024710 | 2808974 - 2809227                      | 1 | - | vacuolar sorting receptor protein, putative    |
| 364 | 3079622 | 3090729 | ChrX | TGME49_024270 | 3094709 - 3095029                      | 3 | - | hypothetical protein, conserved                |
| 365 | 3157909 | 3161669 | ChrX | TGME49_024220 | 3155095 - 3155398                      | 1 | + | serine/threonine protein phosphatase, putative |
| 366 | 3227462 | 3239474 | ChrX | TGME49_024160 | 3224593 - 3224812                      | 2 | + | hypothetical protein                           |
| 367 | 3514842 | 3522160 | ChrX | TGME49_023790 | 3513128 - 3513374<br>3513905 - 3514312 | 2 | + | hypothetical protein, conserved                |
| 368 | 3780966 | 3788836 | ChrX | TGME49_023440 | 3790871 - 3791095                      | 1 | - | ATP-dependent RNA helicase, putative           |
| 369 | 4082889 | 4096163 | ChrX | TGME49_011890 | 4096049 - 4096373                      | 2 | - | hypothetical protein                           |
| 370 | 4098004 | 4098579 | ChrX | TGME49_011880 | 4096049 - 4096373                      | 2 | + | hypothetical protein, conserved                |
| 371 | 4225756 | 4227534 | ChrX | TGME49_034290 | 4229848 - 4230212                      | 1 | - | hypothetical protein                           |
| 372 | 4387640 | 4391737 | ChrX | TGME49_034540 | 4393008 - 4393186                      | 1 | - | hypothetical protein                           |
| 373 | 4436346 | 4443999 | ChrX | TGME49_034610 | 4433144 - 4433422                      | 1 | + | hypothetical protein                           |
| 374 | 4815719 | 4819750 | ChrX | TGME49_035450 | 4820088 - 4820292                      | 1 | - | ubiquitin-conjugating enzyme, putative         |
| 375 | 4953954 | 4960408 | ChrX | TGME49_035650 | 4951269 - 4951373<br>4953710 - 4954022 | 2 | + | methionyl-tRNA formyltransferase, putative     |
| 376 | 4980923 | 4999089 | ChrX | TGME49_035680 | 4998950 - 4999179                      | 1 | - | M16 family peptidase, putative                 |
| 377 | 5001981 | 5003692 | ChrX | TGME49_035690 | 4998950 - 4999179                      | 1 | + | hypothetical protein                           |
| 378 | 5178361 | 5180909 | ChrX | TGME49_036010 | 5182674 - 5182960                      | 1 | - | prenylcysteine oxidase, putative               |
| 379 | 5183317 | 5184837 | ChrX | TGME49_036020 | 5182674 - 5182960                      | 1 | + | BT1 transmembrane domain-containing protein    |
| 380 | 5292169 | 5297782 | ChrX | TGME49_036250 | 5291522 - 5291809                      | 1 | + | hypothetical protein, conserved                |
| 381 | 5324327 | 5326426 | ChrX | TGME49_036400 | 5326695 - 5326864<br>5327831 - 5328087 | 3 | - | hypothetical protein                           |
| 382 | 5356496 | 5358751 | ChrX | TGME49_036550 | 5359046 - 5359251                      | 2 | - | hypothetical protein                           |
| 383 | 5360925 | 5369195 | ChrX | TGME49_036560 | 5359046 - 5359251                      | 2 | + | hypothetical protein                           |
| 384 | 5382596 | 5386249 | ChrX | TGME49_036590 | 5386540 - 5386746                      | 1 | - | hypothetical protein, conserved                |
| 385 | 5393491 | 5399540 | ChrX | TGME49_036620 | 5393122 - 5393319                      | 1 | + | protein kinase incomplete catalytic triad      |
| 386 | 5410182 | 5415050 | ChrX | TGME49_036650 | 5416573 - 5416846                      | 1 | - | DEAD/DEAH box helicase, putative               |
| 387 | 5620314 | 5621942 | ChrX | TGME49_037030 | 5623142 - 5623326                      | 1 | - | hypothetical protein                           |



|     |         |         |       |               |                                        |   |   |                                                                               |
|-----|---------|---------|-------|---------------|----------------------------------------|---|---|-------------------------------------------------------------------------------|
| 388 | 5634912 | 5636233 | ChrX  | TGME49_037070 | 5636831 - 5636972                      | 4 | - | hypothetical protein                                                          |
| 389 | 5681793 | 5687876 | ChrX  | TGME49_037150 | 5688827 - 5689093                      | 1 | - | signal peptide peptidase domain-containing protein                            |
| 390 | 6065500 | 6086829 | ChrX  | TGME49_014230 | 6062247 - 6062481<br>6062929 - 6063264 | 2 | + | dopey, N-terminal domain-containing protein                                   |
| 391 | 6119023 | 6133686 | ChrX  | TGME49_014260 | 6118089 - 6118362                      | 1 | + | alpha-glucan water dikinase 1, putative                                       |
| 392 | 6191614 | 6193326 | ChrX  | TGME49_014330 | 6193455 - 6193720                      | 3 | - | hypothetical protein, conserved                                               |
| 393 | 6193519 | 6197132 | ChrX  | TGME49_014340 | 6193455 - 6193720                      | 3 | + | hypothetical protein, conserved                                               |
| 394 | 6495931 | 6498340 | ChrX  | TGME49_014870 | 6493616 - 6493915<br>6495689 - 6495967 | 8 | + | ribosomal protein L9, N-terminal domain protein                               |
| 395 | 6714322 | 6721370 | ChrX  | TGME49_015150 | 6724107 - 6724304                      | 1 | - | hypothetical protein                                                          |
| 396 | 6729005 | 6731809 | ChrX  | TGME49_015160 | 6724107 - 6724304                      | 1 | + | hypothetical protein                                                          |
| 397 | 6757011 | 6757529 | ChrX  | TGME49_015200 | 6756662 - 6756957                      | 3 | + | hypothetical protein                                                          |
| 398 | 7011170 | 7013925 | ChrX  | TGME49_015660 | 7008224 - 7008443                      | 3 | + | hypothetical protein                                                          |
| 399 | 7088838 | 7089816 | ChrX  | TGME49_015760 | 7088548 - 7089003                      | 2 | + | Cytidine and deoxycytidylate deaminase zinc-binding domain-containing protein |
| 400 | 7350819 | 7351905 | ChrX  | TGME49_007130 | 7352703 - 7353039                      | 2 | - | SRS49A = SAG2Y                                                                |
| 401 | 7358954 | 7360860 | ChrX  | TGME49_007160 | 7361824 - 7362400<br>7362592 - 7362949 | 4 | - | SRS49D = SAG2C                                                                |
| 402 | 7363083 | 7365954 | ChrX  | TGME49_007170 | 7362592 - 7362949                      | 4 | + | hypothetical protein                                                          |
| 403 | 212334  | 216485  | ChrXI | TGME49_106890 | 208978 - 209250                        | 1 | + | platelet binding protein GspB, putative                                       |
| 404 | 597690  | 599219  | ChrXI | TGME49_109270 | 599610 - 599916                        | 1 | - | hypothetical protein                                                          |
| 405 | 600529  | 602669  | ChrXI | TGME49_109280 | 604215 - 604483                        | 1 | - | hypothetical protein                                                          |
| 406 | 604479  | 607321  | ChrXI | TGME49_109290 | 604215 - 604483                        | 1 | + | HD domain-containing protein                                                  |
| 407 | 813248  | 817742  | ChrXI | TGME49_109800 | 818095 - 818331                        | 1 | - | small nuclear ribonucleoprotein U1A, putative                                 |
| 408 | 900697  | 907436  | ChrXI | TGME49_109930 | 908425 - 908686                        | 1 | - | alpha-N-acetylgalactosaminidase, putative                                     |
| 409 | 911252  | 919673  | ChrXI | TGME49_109940 | 908425 - 908686                        | 1 | + | cardiolipin synthase, putative                                                |
| 410 | 935457  | 979511  | ChrXI | TGME49_109980 | 979447 - 979555                        | 1 | - | dynein-1-alpha heavy chain, flagellar inner arm I1 complex, putative          |
| 411 | 981785  | 983521  | ChrXI | TGME49_109990 | 979447 - 979555                        | 1 | + | hypothetical protein, conserved                                               |

|     |         |         |       |               |                                                                                  |   |   |                                                                                   |
|-----|---------|---------|-------|---------------|----------------------------------------------------------------------------------|---|---|-----------------------------------------------------------------------------------|
| 412 | 1333515 | 1335087 | ChrXI | TGME49_110440 | 1332346 - 1332647                                                                | 1 | + | phosphatidylinositol-4-phosphate 5-kinase, putative                               |
| 413 | 1415530 | 1418956 | ChrXI | TGME49_110540 | 1418956 - 1419137                                                                | 1 | - | hypothetical protein, conserved                                                   |
| 414 | 1597637 | 1601435 | ChrXI | TGME49_110810 | 1594474 - 1594773                                                                | 2 | + | apyrase, putative                                                                 |
| 415 | 1610625 | 1612370 | ChrXI | TGME49_110830 | 1610492 - 1610602                                                                | 1 | + | delta3,5-delta2,4-dienoyl-CoA isomerase, putative                                 |
| 416 | 2381850 | 2384378 | ChrXI | TGME49_112040 | 2380651 - 2380796                                                                | 1 | + | hypothetical protein                                                              |
| 417 | 2715571 | 2720334 | ChrXI | TGME49_112490 | 2715485 - 2715774                                                                | 1 | + | hypothetical protein                                                              |
| 418 | 2735542 | 2740722 | ChrXI | TGME49_112510 | 2740491 - 2740845<br>2741508 - 2741744<br>2742924 - 2743272<br>2743473 - 2743738 | 6 | - | hypothetical protein                                                              |
| 419 | 2809164 | 2811726 | ChrXI | TGME49_112600 | 2807806 - 2808091                                                                | 1 | + | small heat shock protein 21                                                       |
| 420 | 2977795 | 2979911 | ChrXI | TGME49_112930 | 2981082 - 2981419                                                                | 2 | - | cystathionine beta-lyase, putative                                                |
| 421 | 4010701 | 4017120 | ChrXI | TGME49_114340 | 4019519 - 4019625                                                                | 1 | - | sodium- and chloride-dependent neutral and basic amino acid transporter, putative |
| 422 | 4047152 | 4050510 | ChrXI | TGME49_114390 | 4051471 - 4051738                                                                | 5 | - | hypothetical protein                                                              |
| 423 | 4052244 | 4057265 | ChrXI | TGME49_114400 | 4051471 - 4051738                                                                | 5 | + | branched-chain alpha-keto acid dehydrogenase E1 component beta chain, putative    |
| 424 | 4140592 | 4150935 | ChrXI | TGME49_114500 | 4154561 - 4155070                                                                | 2 | - | subtilisin-like protease TgSUB2                                                   |
| 425 | 4155284 | 4155772 | ChrXI | TGME49_114510 | 4154561 - 4155070                                                                | 2 | + | hypothetical protein, conserved                                                   |
| 426 | 4716046 | 4719039 | ChrXI | TGME49_115440 | 4714711 - 4714982                                                                | 2 | + | hypothetical protein                                                              |
| 427 | 4724484 | 4728225 | ChrXI | TGME49_115450 | 4719877 - 4720130<br>4720208 - 4720722                                           | 3 | + | hypothetical protein, conserved                                                   |
| 428 | 4941606 | 4943921 | ChrXI | TGME49_115730 | 4940529 - 4940820<br>4941019 - 4941216                                           | 3 | + | apical membrane antigen, putative                                                 |
| 429 | 5083049 | 5086042 | ChrXI | TGME49_115920 | 5087951 - 5088256                                                                | 1 | - | RNA polymerase II subunit RPB11, putative                                         |
| 430 | 5088176 | 5089688 | ChrXI | TGME49_115930 | 5087951 - 5088256                                                                | 1 | + | hypothetical protein                                                              |
| 431 | 5300086 | 5315164 | ChrXI | TGME49_116440 | 5299862 - 5300117                                                                | 2 | + | phosphatidylinositol 3- and 4-kinase domain-containing protein                    |
| 432 | 5419663 | 5419735 | ChrXI | TGME49_116590 | 5418549 - 5418686                                                                | 1 | + | tRNA-Lys                                                                          |

|     |         |         |        |               |                                                             |   |   |                                                 |
|-----|---------|---------|--------|---------------|-------------------------------------------------------------|---|---|-------------------------------------------------|
| 433 | 5547619 | 5557919 | ChrXI  | TGME49_116730 | 5547351 - 5547698                                           | 1 | + | hypothetical protein                            |
|     |         |         |        |               | 5635624 - 5635820                                           |   |   |                                                 |
| 434 | 5631188 | 5634067 | ChrXI  | TGME49_017230 | 5636262 - 5636484<br>5636594 - 5636943                      | 5 | - | hypothetical protein                            |
|     |         |         |        |               | 5980946 - 5981314                                           |   |   |                                                 |
| 435 | 5974913 | 5979394 | ChrXI  | TGME49_016650 | 5981340 - 5981500<br>5982366 - 5982703                      | 3 | - | hypothetical protein, conserved                 |
|     |         |         |        |               | 5980946 - 5981314                                           |   |   |                                                 |
| 436 | 5982374 | 5985736 | ChrXI  | TGME49_016640 | 5981340 - 5981500<br>5982366 - 5982703                      | 3 | + | homoserine kinase, putative                     |
| 437 | 6099855 | 6108667 | ChrXI  | TGME49_016500 | 6109947 - 6110176                                           | 1 | - | tRNA synthetase, putative                       |
| 438 | 6120192 | 6122156 | ChrXI  | TGME49_016470 | 6124660 - 6124830                                           | 1 | - | hypothetical protein                            |
| 439 | 6125385 | 6127560 | ChrXI  | TGME49_016460 | 6124660 - 6124830                                           | 1 | + | hypothetical protein                            |
| 440 | 6341501 | 6347493 | ChrXI  | TGME49_016190 | 6341110 - 6341357                                           | 3 | + | hypothetical protein                            |
|     |         |         |        |               | 6470635 - 6470874                                           |   |   |                                                 |
| 441 | 6473977 | 6485407 | ChrXI  | TGME49_015990 | 6471105 - 6471302<br>6473633 - 6473738<br>6473815 - 6473977 | 4 | + | helicase, putative                              |
| 442 | 27260   | 29792   | ChrXII | TGME49_100360 | 30159 - 30314                                               | 1 | - | mitochondrial carrier domain-containing protein |
| 443 | 31749   | 39660   | ChrXII | TGME49_100350 | 30159 - 30314                                               | 1 | + | molybdopterin cofactor sulfurase, putative      |
| 444 | 123772  | 130199  | ChrXII | TGME49_100220 | 130034 - 130263                                             | 1 | - | hypothetical protein                            |
|     |         |         |        |               | 305399 - 305653                                             |   |   |                                                 |
| 445 | 300477  | 304309  | ChrXII | TGME49_099820 | 305699 - 305864                                             | 3 | - | hypothetical protein                            |
| 446 | 407542  | 410686  | ChrXII | TGME49_107830 | 410776 - 410988                                             | 4 | - | hypothetical protein                            |
| 447 | 784684  | 791915  | ChrXII | TGME49_019620 | 794375 - 794785                                             | 1 | - | hypothetical protein                            |
| 448 | 795149  | 796170  | ChrXII | TGME49_019610 | 794375 - 794785                                             | 1 | + | hypothetical protein                            |
|     |         |         |        |               | 1099572 - 1099817                                           |   |   |                                                 |
| 449 | 1098304 | 1099255 | ChrXII | TGME49_019110 | 1099955 - 1100201                                           | 4 | - | hypothetical protein, conserved                 |
| 450 | 1146244 | 1157172 | ChrXII | TGME49_018960 | 1156996 - 1157306                                           | 1 | - | hypothetical protein                            |
| 451 | 1252646 | 1257516 | ChrXII | TGME49_018810 | 1251072 - 1251282                                           | 1 | + | histidyl tRNA synthetase 2                      |
| 452 | 1714056 | 1726196 | ChrXII | TGME49_017330 | 1729487 - 1729838                                           | 1 | - | hypothetical protein                            |
| 453 | 1731213 | 1734946 | ChrXII | TGME49_017340 | 1729487 - 1729838                                           | 1 | + | hypothetical protein                            |

|     |         |         |        |               |                                                             |   |   |                                                     |
|-----|---------|---------|--------|---------------|-------------------------------------------------------------|---|---|-----------------------------------------------------|
| 454 | 1848268 | 1849720 | ChrXII | TGME49_017490 | 1847423 - 1847546                                           | 1 | + | hypothetical protein                                |
| 455 | 1980067 | 1990059 | ChrXII | TGME49_017690 | 1993779 - 1994018                                           | 1 | - | hypothetical protein                                |
| 456 | 1997873 | 2003306 | ChrXII | TGME49_017700 | 1993779 - 1994018                                           | 1 | + | hypothetical protein                                |
| 457 | 2048327 | 2050819 | ChrXII | TGME49_017730 | 2052359 - 2052693                                           | 1 | - | hypothetical protein                                |
| 458 | 2057672 | 2061404 | ChrXII | TGME49_017740 | 2052359 - 2052693                                           | 1 | + | oxoacyl-ACP reductase, putative                     |
| 459 | 2435798 | 2441946 | ChrXII | TGME49_045660 | 2441620 - 2441949                                           | 1 | - | hypothetical protein, conserved                     |
| 460 | 2443396 | 2447710 | ChrXII | TGME49_045670 | 2441620 - 2441949                                           | 1 | + | pyruvate dehydrogenase, putative                    |
| 461 | 2483984 | 2500508 | ChrXII | TGME49_045730 | 2480927 - 2481176<br>2482847 - 2483123<br>2483389 - 2483630 | 4 | + | phosphatidylinositol-4-phosphate 5-Kinase, putative |
| 462 | 2562607 | 2565070 | ChrXII | TGME49_045990 | 2565070 - 2565499                                           | 1 | - | hypothetical protein                                |
| 463 | 2566420 | 2569266 | ChrXII | TGME49_046000 | 2565070 - 2565499                                           | 1 | + | hypothetical protein                                |
| 464 | 2737316 | 2739454 | ChrXII | TGME49_046220 | 2741593 - 2741859                                           | 1 | - | hypothetical protein, conserved                     |
| 465 | 2743034 | 2747070 | ChrXII | TGME49_046330 | 2749002 - 2749104                                           | 7 | - | CRAL/TRIO domain-containing protein                 |
| 466 | 2749745 | 2756782 | ChrXII | TGME49_046340 | 2749002 - 2749104                                           | 7 | + | DnaJ domain-containing protein                      |
| 467 | 2852061 | 2853012 | ChrXII | TGME49_046590 | 2850941 - 2851184                                           | 2 | + | hypothetical protein                                |
| 468 | 2943595 | 2947580 | ChrXII | TGME49_046750 | 2950529 - 2950677                                           | 1 | - | hypothetical protein                                |
| 469 | 2950548 | 2966587 | ChrXII | TGME49_046760 | 2950529 - 2950677                                           | 1 | + | hypothetical protein                                |
| 470 | 3038065 | 3054715 | ChrXII | TGME49_046980 | 3054769 - 3055074                                           | 1 | - | hypothetical protein                                |
| 471 | 3057232 | 3063231 | ChrXII | TGME49_046990 | 3054769 - 3055074                                           | 1 | + | hypothetical protein                                |
| 472 | 3193930 | 3203380 | ChrXII | TGME49_047280 | 3204193 - 3204586                                           | 1 | - | hypothetical protein                                |
| 473 | 3205456 | 3214729 | ChrXII | TGME49_047290 | 3204193 - 3204586                                           | 1 | + | hypothetical protein                                |
| 474 | 3280123 | 3287210 | ChrXII | TGME49_047380 | 3289217 - 3289494<br>3289587 - 3289830                      | 5 | - | hypothetical protein                                |
| 475 | 3291146 | 3306446 | ChrXII | TGME49_047390 | 3289217 - 3289494<br>3289587 - 3289830                      | 5 | + | ATPase, AAA family domain-containing protein        |
| 476 | 3353708 | 3356296 | ChrXII | TGME49_047490 | 3352727 - 3353059                                           | 1 | + | hypothetical protein                                |
| 477 | 3542054 | 3544246 | ChrXII | TGME49_047750 | 3540412 - 3540721                                           | 2 | + | hypothetical protein                                |
| 478 | 3592023 | 3598216 | ChrXII | TGME49_047910 | 3598497 - 3598770                                           | 3 | - | hypothetical protein                                |

|     |         |         |        |               |                                                             |   |   |                                                |
|-----|---------|---------|--------|---------------|-------------------------------------------------------------|---|---|------------------------------------------------|
| 479 | 3621860 | 3622962 | ChrXII | TGME49_047960 | 3623897 - 3624141                                           | 1 | - | hypothetical protein                           |
| 480 | 3626937 | 3630008 | ChrXII | TGME49_047970 | 3623897 - 3624141                                           | 1 | + | hypothetical protein                           |
| 481 | 3668974 | 3671744 | ChrXII | TGME49_048140 | 3673166 - 3673387                                           | 1 | - | hypothetical protein                           |
| 482 | 3743943 | 3747199 | ChrXII | TGME49_048250 | 3748003 - 3748299                                           | 1 | - | pre-mRNA-splicing factor, putative             |
| 483 | 3748250 | 3749667 | ChrXII | TGME49_048260 | 3748003 - 3748299                                           | 1 | + | hypothetical protein                           |
| 484 | 3752963 | 3755536 | ChrXII | TGME49_048270 | 3749670 - 3749953                                           | 1 | + | zinc finger CCCH type protein, putative        |
| 485 | 3762330 | 3775305 | ChrXII | TGME49_048290 | 3761778 - 3762097                                           | 1 | + | WD domain-containing protein                   |
| 486 | 3869966 | 3872218 | ChrXII | TGME49_048490 | 3872357 - 3872592                                           | 1 | - | hypothetical protein                           |
| 487 | 3872374 | 3876523 | ChrXII | TGME49_048500 | 3872357 - 3872592                                           | 1 | + | hypothetical protein                           |
| 488 | 4178449 | 4194388 | ChrXII | TGME49_048830 | 4195879 - 4196122                                           | 1 | - | phospholipase C delta 1                        |
| 489 | 4241444 | 4245616 | ChrXII | TGME49_048940 | 4247949 - 4248198                                           | 1 | - | zinc knuckle domain-containing protein         |
| 490 | 5263249 | 5267883 | ChrXII | TGME49_050870 | 5269760 - 5270081                                           | 1 | - | zinc finger DHHC domain-containing protein     |
| 491 | 5459026 | 5463668 | ChrXII | TGME49_051590 | 5465436 - 5465836                                           | 3 | - | protease, putative                             |
| 492 | 5467865 | 5470960 | ChrXII | TGME49_051600 | 5465436 - 5465836                                           | 3 | + | RNA processing factor, putative                |
| 493 | 5579633 | 5581733 | ChrXII | TGME49_051800 | 5582314 - 5582603                                           | 1 | - | hypothetical protein                           |
| 494 | 5584385 | 5585487 | ChrXII | TGME49_051810 | 5587819 - 5587939                                           | 1 | - | translation initiation factor eIF-5A, putative |
| 495 | 5623296 | 5627789 | ChrXII | TGME49_051880 | 5629520 - 5629725                                           | 1 | - | tyrosyl-tRNA synthetase, putative              |
| 496 | 5698121 | 5698555 | ChrXII | TGME49_078980 | 5699013 - 5699183                                           | 2 | - | hypothetical protein, conserved                |
| 497 | 5882694 | 5885741 | ChrXII | TGME49_078760 | 5887068 - 5887429<br>5887777 - 5887924                      | 2 | - | hypothetical protein                           |
| 498 | 5891634 | 5892137 | ChrXII | TGME49_078750 | 5887068 - 5887429<br>5887777 - 5887924                      | 2 | + | hypothetical protein                           |
| 499 | 5928652 | 5930500 | ChrXII | TGME49_078670 | 5932676 - 5932993                                           | 1 | - | ubiquitin-conjugating enzyme E2, putative      |
| 500 | 5934976 | 5947946 | ChrXII | TGME49_078660 | 5932676 - 5932993                                           | 1 | + | P-type Ca <sup>2+</sup> -ATPase, putative      |
| 501 | 6145005 | 6146216 | ChrXII | TGME49_078320 | 6146368 - 6146532<br>6146755 - 6147157<br>6147470 - 6147717 | 5 | - | hypothetical protein                           |
| 502 | 6150877 | 6151236 | ChrXII | TGME49_078300 | 6151545 - 6151823<br>6152632 - 6152902                      | 3 | - | hypothetical protein                           |

|     |         |         |        |               |                                        |   |   |                                          |
|-----|---------|---------|--------|---------------|----------------------------------------|---|---|------------------------------------------|
| 503 | 6212244 | 6220206 | ChrXII | TGME49_078210 | 6220299 - 6220618<br>6220923 - 6221226 | 6 | - | hypothetical protein                     |
| 504 | 6243864 | 6245051 | ChrXII | TGME49_078180 | 6246337 - 6246719                      | 1 | - | hypothetical protein                     |
| 505 | 6246724 | 6247701 | ChrXII | TGME49_078170 | 6248233 - 6248615                      | 1 | - | hypothetical protein                     |
| 506 | 6248819 | 6251376 | ChrXII | TGME49_078160 | 6248233 - 6248615                      | 1 | + | hypothetical protein                     |
| 507 | 6293587 | 6295014 | ChrXII | TGME49_078090 | 6292151 - 6292444<br>6293128 - 6293347 | 2 | + | hypothetical protein                     |
| 508 | 6295668 | 6297827 | ChrXII | TGME49_078080 | 6295041 - 6295220                      | 1 | + | hypothetical protein                     |
| 509 | 6441980 | 6443151 | ChrXII | TGME49_077880 | 6443417 - 6443582<br>6444628 - 6444910 | 4 | - | hypothetical protein                     |
| 510 | 6445071 | 6450102 | ChrXII | TGME49_077870 | 6443417 - 6443582<br>6444628 - 6444910 | 4 | + | hypothetical protein, conserved          |
| 511 | 6469352 | 6475317 | ChrXII | TGME49_077840 | 6475454 - 6475683                      | 2 | - | Ras family domain containing protein     |
| 512 | 6532758 | 6535725 | ChrXII | TGME49_077740 | 6536233 - 6536518                      | 1 | - | hypothetical protein                     |
| 513 | 6537212 | 6538178 | ChrXII | TGME49_077730 | 6536233 - 6536518                      | 1 | + | hypothetical protein, conserved          |
| 514 | 6689124 | 6690700 | ChrXII | TGME49_077220 | 6691522 - 6691827                      | 2 | - | hypothetical protein                     |
| 515 | 6693175 | 6695593 | ChrXII | TGME49_077210 | 6691522 - 6691827                      | 2 | + | XPG N-terminal domain containing protein |
| 516 | 6879564 | 6880400 | ChrXII | TGME49_076840 | 6880249 - 6880455                      | 2 | - | hypothetical protein, conserved          |
